# Supplementary material
Source: PubMed Central journal article supplement (PMC5605472)
Supplement: 13205_2017_978_MOESM1_ESM.pdf [file 13205_2017_978_MOESM1_ESM.pdf]

### **3 Biotech**

#### **Prokaryotic diversity and biochemical properties in aging artificial pit-mud used for production of Chinese Strong Flavor Liquor**

Zhongke Sun<sup>1,2</sup>, Can Chen<sup>1,2</sup>, Xiaoge Hou<sup>1</sup>, Jie Zhang<sup>1</sup>, Fengshou Tian<sup>2</sup>, Chengwei Li<sup>1,3\*</sup>

1. College of Life Sciences and Agronomy, Zhoukou Normal University, Zhoukou City, 466001, China

2. Institute of Food and Drug Inspection, Zhoukou Normal University, Zhoukou City, 466001, China

3. Key Laboratory of Plant Genetics and Molecular Breeding, Zhoukou Normal University, Zhoukou City, 466001, China

\*Corresponding author

Prof. Dr. Chengwei Li

Email: [lichw\\_pgmb@sina.com](mailto:lichw_pgmb@sina.com)

Tel: +86-0394-8178257

Postal Address: Room A102, Life Sciences Building, East Wenchang Road, Chuanhui District, Zhoukou City, 466001, China

ORCID: 0000-0001-6977-8273

## Supplementary materials

### Tables

Table S1 Statistical information of sequencing dataset

| Sample Name | Raw PE  | Qualified | Avg. Len (nt) | Q20   | Q30   | GC%   | Effective % |
|-------------|---------|-----------|---------------|-------|-------|-------|-------------|
| NS1.1       | 64,493  | 60,530    | 253           | 99.2  | 98.56 | 54.54 | 87.91       |
| NS1.2       | 35,455  | 32,795    | 253           | 99.54 | 99.07 | 53.51 | 88.98       |
| NS1.3       | 106,644 | 85,386    | 253           | 99.48 | 98.96 | 53.78 | 75.52       |
| OS1.1       | 44,159  | 38,262    | 254           | 99.09 | 98.35 | 53.34 | 76.7        |
| OS1.2       | 103,149 | 80,706    | 253           | 99.56 | 99.08 | 53.31 | 76.48       |
| OS1.3       | 78,161  | 71,683    | 253           | 99.57 | 99.12 | 53.69 | 89.59       |

Table S2 Quantification of three cultivable bacterial groups in pit-mud on agar plate

| Samples*                       | NS1.1     | NS1.2     | NS1.3     | OS1.1    | OS1.2    | OS1.3    |
|--------------------------------|-----------|-----------|-----------|----------|----------|----------|
| Lactobacilli                   | 20.63±0.2 | 18.12±0.8 | 19.67±0.3 | 66.3±0.5 | 60.4±0.1 | 71.5±0.4 |
| Clostridia                     | 3.52±0.3  | 3.45±0.5  | 3.61±0.8  | 3.01±0.4 | 3.18±0.2 | 3.19±0.6 |
| Aerobic spore forming bacteria | 36.25±0.6 | 39.13±0.1 | 32.85±0.3 | 81.5±0.1 | 78.0±0.2 | 80.2±0.5 |

All data are presented as means ± standard deviations (n = 3), \* 10<sup>5</sup>cfu per gram of wet pit-mud.

## Figures

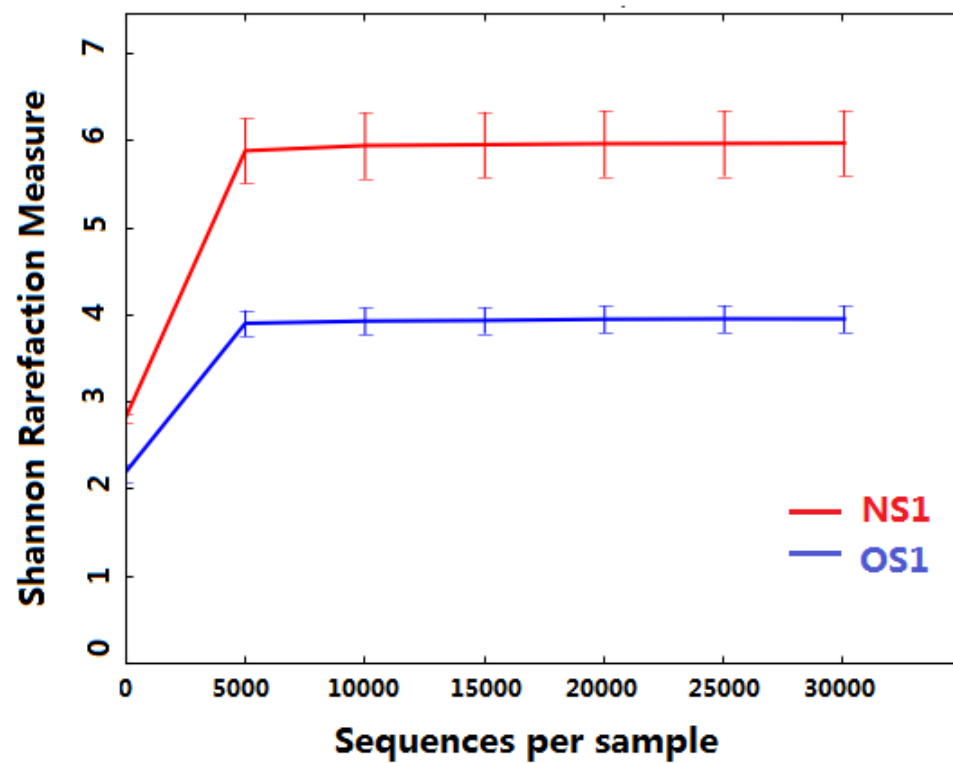

Fig. S1 Shannon rarefaction curves of different samples

NS1 is high quality pit-mud, including samples NS1.1, NS1.2, NS1.3; OS1 is aging low quality pit-mud, including samples OS1.1, OS1.2, OS1.3.

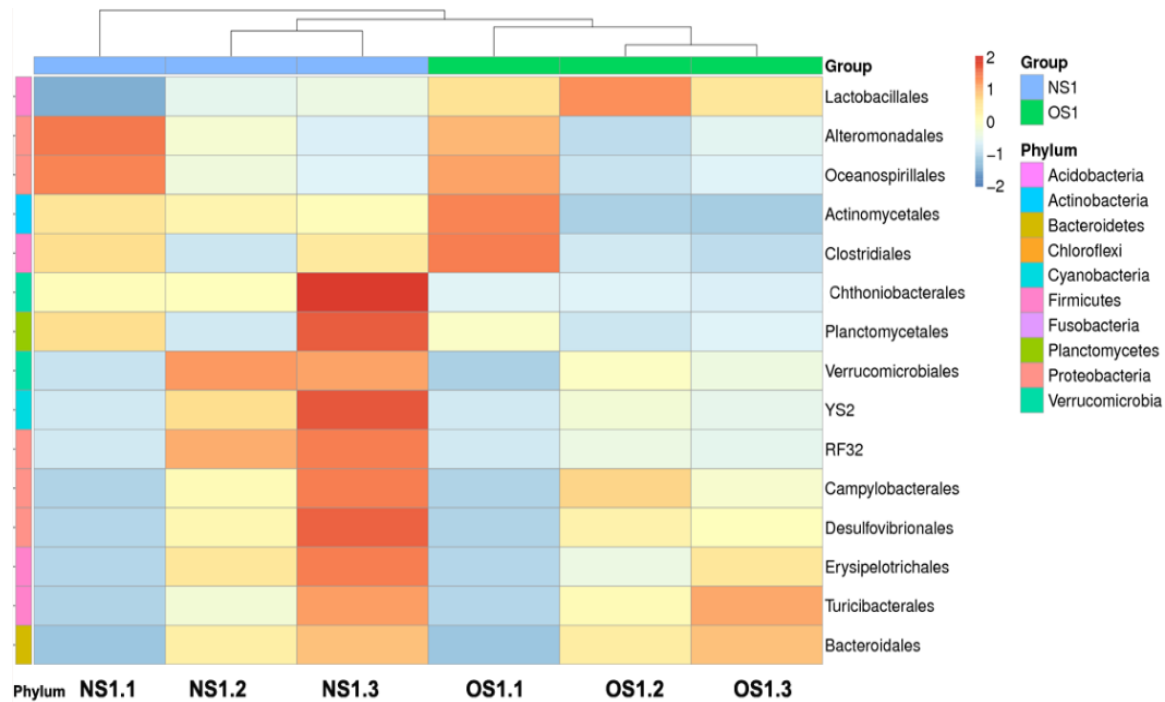

Fig. S2 Heatmap of top 15 orders in each sample

The top 15 most-abundant orders in each sample were selected and compared with their abundances (log scale) in other samples. NS1 are high quality pit-mud, including samples NS1.1, NS1.2, NS1.3; OS1 are aging low quality pit-mud, including samples OS1.1, OS1.2, OS1.3.

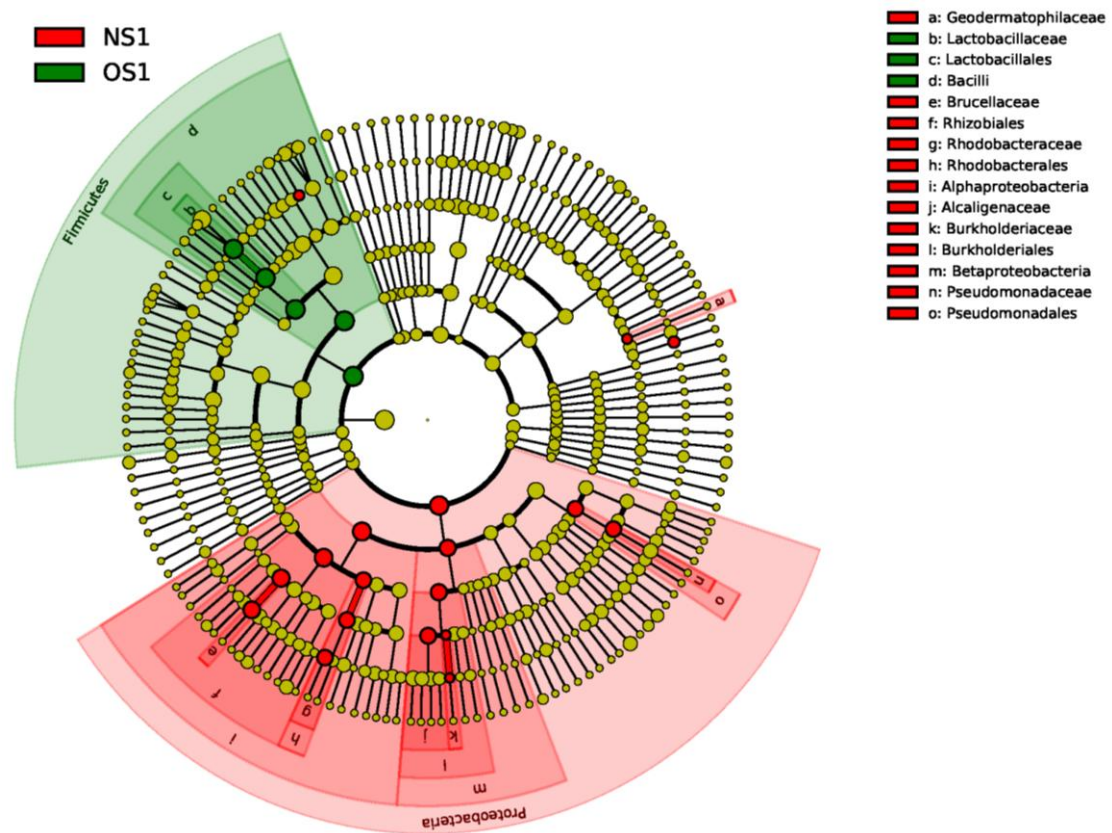

Fig. S3 Cladogram of the different biomarkers in two kinds of pit-mud by Linear discriminated analysis Effect Size (LEfSe)

NS1 are high quality pit-mud, including samples NS1.1, NS1.2, NS1.3; OS1 are aging low quality pit-mud, including samples OS1.1, OS1.2, OS1.3.

## Datasets

### Dataset 1 Statistical analysis of community composition in phylum level

| Taxa                           | mean(NS1) | variance | STDEV  | mean(OS1) | variance | STDEV  | p value | q value |
|--------------------------------|-----------|----------|--------|-----------|----------|--------|---------|---------|
| k_Bacteria;p_Firmicutes;       | 0.4840    | 0.0046   | 0.0390 | 0.8362    | 0.0002   | 0.0080 | 0.0000  | 0.0000  |
| k_Bacteria;p_Proteobacteria;   | 0.4159    | 0.0082   | 0.0523 | 0.0840    | 0.0014   | 0.0216 | 0.0040  | 0.0545  |
| k_Bacteria;p_Bacteroidetes;    | 0.0591    | 0.0023   | 0.0276 | 0.0578    | 0.0025   | 0.0291 | 0.9398  | 1.0000  |
| k_Bacteria;p_Actinobacteria;   | 0.0183    | 0.0000   | 0.0014 | 0.0116    | 0.0002   | 0.0089 | 0.4866  | 0.6569  |
| k_Bacteria;p_Fusobacteria;     | 0.0022    | 0.0000   | 0.0018 | 0.0004    | 0.0000   | 0.0003 | 0.3813  | 0.6088  |
| k_Bacteria;p_Verrucomicrobia;  | 0.0036    | 0.0000   | 0.0011 | 0.0006    | 0.0000   | 0.0001 | 0.0190  | 0.1710  |
| k_Bacteria;p_Gemmatimonadetes; | 0.0028    | 0.0000   | 0.0010 | 0.0009    | 0.0000   | 0.0001 | 0.0965  | 0.3400  |
| k_Bacteria;p_Acidobacteria;    | 0.0027    | 0.0000   | 0.0007 | 0.0012    | 0.0000   | 0.0002 | 0.0661  | 0.2975  |
| k_Bacteria;p_Tenericutes;      | 0.0017    | 0.0000   | 0.0005 | 0.0016    | 0.0000   | 0.0011 | 0.8834  | 1.0000  |
| k_Bacteria;p_Planctomycetes;   | 0.0022    | 0.0000   | 0.0011 | 0.0004    | 0.0000   | 0.0003 | 0.1653  | 0.4098  |
| k_Bacteria;p_Cyanobacteria;    | 0.0020    | 0.0000   | 0.0007 | 0.0004    | 0.0000   | 0.0002 | 0.0621  | 0.2975  |
| k_Bacteria;p_Chloroflexi;      | 0.0018    | 0.0000   | 0.0005 | 0.0004    | 0.0000   | 0.0001 | 0.0465  | 0.2975  |
| k_Bacteria;p_BRC1;             | 0.0005    | 0.0000   | 0.0003 | 0.0001    | 0.0000   | 0.0001 | 0.1933  | 0.4098  |
| k_Bacteria;p_Deferribacteres;  | 0.0005    | 0.0000   | 0.0002 | 0.0002    | 0.0000   | 0.0001 | 0.3854  | 0.6088  |
| k_Bacteria;p_TM6;              | 0.0002    | 0.0000   | 0.0002 | 0.0001    | 0.0000   | 0.0001 | 0.4385  | 0.6231  |
| k_Archaea;p_Crenarchaeota;     | 0.0003    | 0.0000   | 0.0001 | 0.0001    | 0.0000   | 0.0001 | 0.2932  | 0.5654  |
| k_Bacteria;p_Nitrospirae;      | 0.0001    | 0.0000   | 0.0000 | 0.0003    | 0.0000   | 0.0001 | 0.4059  | 0.6088  |
| k_Bacteria;p_Chlamydiae;       | 0.0001    | 0.0000   | 0.0000 | 0.0000    | 0.0000   | 0.0000 | 0.1133  | 0.3400  |
| k_Bacteria;p_Synergistetes;    | 0.0000    | 0.0000   | 0.0000 | 0.0001    | 0.0000   | 0.0000 | 0.3255  | 0.5859  |
| k_Bacteria;p_Armatimonadetes;  | 0.0000    | 0.0000   | 0.0000 | 0.0000    | 0.0000   | 0.0000 | 0.8152  | 1.0000  |
| k_Bacteria;p_TM7;              | 0.0000    | 0.0000   | 0.0000 | 0.0000    | 0.0000   | 0.0000 | 0.1973  | 0.4098  |
| k_Bacteria;p_Lentisphaerae;    | 0.0000    | 0.0000   | 0.0000 | 0.0000    | 0.0000   | 0.0000 | 0.1973  | 0.4098  |
| k_Bacteria;p_WPS-2;            | 0.0000    | 0.0000   | 0.0000 | 0.0000    | 0.0000   | 0.0000 | 0.1133  | 0.3400  |
| k_Archaea;p_Euryarchaeota;     | 0.0000    | 0.0000   | 0.0000 | 0.0000    | 0.0000   | 0.0000 | 1.0000  | 1.0000  |
| k_Bacteria;p_GAL15;            | 0.0000    | 0.0000   | 0.0000 | 0.0000    | 0.0000   | 0.0000 | 1.0000  | 1.0000  |
| k_Bacteria;p_AD3;              | 0.0000    | 0.0000   | 0.0000 | 0.0000    | 0.0000   | 0.0000 | 1.0000  | 1.0000  |
| Others                         | 0.0018    | 0.0000   | 0.0005 | 0.0036    | 0.0000   | 0.0029 | 0.5908  | 0.7595  |

## Dataset 2 Statistical analysis of community composition in class level

| Taxa                                                   | mean(NS1) | variance | STDEV  | mean(OS1) | variance | STDEV  | p value | q value |
|--------------------------------------------------------|-----------|----------|--------|-----------|----------|--------|---------|---------|
| k_Bacteria;p__Firmicutes;c__Bacilli;                   | 0.3377    | 0.0016   | 0.0229 | 0.7133    | 0.0238   | 0.0891 | 0.0144  | 0.4551  |
| k_Bacteria;p__Proteobacteria;c__Alphaproteobacteria;   | 0.2896    | 0.0076   | 0.0503 | 0.0650    | 0.0013   | 0.0209 | 0.0108  | 0.4551  |
| k_Bacteria;p__Firmicutes;c__Clostridia;                | 0.1449    | 0.0077   | 0.0506 | 0.1222    | 0.0218   | 0.0852 | 0.8569  | 0.9816  |
| k_Bacteria;p__Proteobacteria;c__Gammaproteobacteria;   | 0.0659    | 0.0054   | 0.0423 | 0.0077    | 0.0000   | 0.0039 | 0.2412  | 0.5505  |
| k_Bacteria;p__Bacteroidetes;c__Bacteroidia;            | 0.0568    | 0.0025   | 0.0291 | 0.0575    | 0.0026   | 0.0293 | 0.9715  | 1.0000  |
| k_Bacteria;p__Proteobacteria;c__Betaproteobacteria;    | 0.0508    | 0.0011   | 0.0192 | 0.0073    | 0.0000   | 0.0022 | 0.0661  | 0.5058  |
| k_Bacteria;p__Actinobacteria;c__Actinobacteria;        | 0.0172    | 0.0000   | 0.0014 | 0.0109    | 0.0002   | 0.0091 | 0.5749  | 0.7391  |
| k_Bacteria;p__Proteobacteria;c__Deltaproteobacteria;   | 0.0064    | 0.0000   | 0.0022 | 0.0017    | 0.0000   | 0.0003 | 0.0803  | 0.5058  |
| k_Bacteria;p__Proteobacteria;c__Epsilonproteobacteria; | 0.0031    | 0.0000   | 0.0019 | 0.0023    | 0.0000   | 0.0013 | 0.7728  | 0.9016  |
| k_Bacteria;p__Fusobacteria;c__Fusobacteriia;           | 0.0022    | 0.0000   | 0.0018 | 0.0004    | 0.0000   | 0.0003 | 0.3906  | 0.6603  |
| k_Bacteria;p__Verrucomicrobia;c__[Spartobacteria];     | 0.0021    | 0.0000   | 0.0009 | 0.0001    | 0.0000   | 0.0000 | 0.0768  | 0.5058  |
| k_Bacteria;p__Planctomycetes;c__Planctomycetia;        | 0.0021    | 0.0000   | 0.0011 | 0.0003    | 0.0000   | 0.0003 | 0.1640  | 0.5505  |
| k_Bacteria;p__Tenericutes;c__CK-1C4-19;                | 0.0011    | 0.0000   | 0.0003 | 0.0012    | 0.0000   | 0.0010 | 0.8971  | 1.0000  |
| k_Bacteria;p__Cyanobacteria;c__4C0d-2;                 | 0.0014    | 0.0000   | 0.0008 | 0.0003    | 0.0000   | 0.0002 | 0.2143  | 0.5505  |
| k_Bacteria;p__Firmicutes;c__Erysipelotrichi;           | 0.0013    | 0.0000   | 0.0007 | 0.0007    | 0.0000   | 0.0004 | 0.5284  | 0.7237  |
| k_Bacteria;p__Bacteroidetes;c__[Saprosirae];           | 0.0008    | 0.0000   | 0.0007 | 0.0001    | 0.0000   | 0.0001 | 0.4033  | 0.6603  |
| k_Bacteria;p__Acidobacteria;c__Acidobacteria-6;        | 0.0014    | 0.0000   | 0.0004 | 0.0006    | 0.0000   | 0.0002 | 0.1444  | 0.5505  |
| k_Bacteria;p__Bacteroidetes;c__Cytophagia;             | 0.0006    | 0.0000   | 0.0004 | 0.0000    | 0.0000   | 0.0000 | 0.2447  | 0.5505  |
| k_Bacteria;p__Verrucomicrobia;c__Verrucomicrobiae;     | 0.0009    | 0.0000   | 0.0004 | 0.0003    | 0.0000   | 0.0002 | 0.2429  | 0.5505  |
| k_Bacteria;p__Chloroflexi;c__Anaerolineae;             | 0.0005    | 0.0000   | 0.0004 | 0.0000    | 0.0000   | 0.0000 | 0.2855  | 0.5621  |
| k_Bacteria;p__Bacteroidetes;c__Sphingobacteriia;       | 0.0007    | 0.0000   | 0.0003 | 0.0001    | 0.0000   | 0.0000 | 0.1552  | 0.5505  |
| k_Bacteria;p__Gemmatimonadetes;c__Gemm-3;              | 0.0009    | 0.0000   | 0.0003 | 0.0003    | 0.0000   | 0.0000 | 0.0785  | 0.5058  |
| k_Bacteria;p__Gemmatimonadetes;c__Gemmatimonadetes;    | 0.0007    | 0.0000   | 0.0002 | 0.0004    | 0.0000   | 0.0000 | 0.1712  | 0.5505  |
| k_Bacteria;p__Tenericutes;c__Mollicutes;               | 0.0006    | 0.0000   | 0.0003 | 0.0004    | 0.0000   | 0.0002 | 0.5462  | 0.7241  |
| k_Bacteria;p__Gemmatimonadetes;c__Gemm-1;              | 0.0006    | 0.0000   | 0.0003 | 0.0001    | 0.0000   | 0.0000 | 0.2284  | 0.5505  |
| k_Bacteria;p__Verrucomicrobia;c__[Pedosphaerae];       | 0.0005    | 0.0000   | 0.0003 | 0.0002    | 0.0000   | 0.0001 | 0.4298  | 0.6605  |
| k_Bacteria;p__Actinobacteria;c__Thermoleophilia;       | 0.0009    | 0.0000   | 0.0001 | 0.0005    | 0.0000   | 0.0001 | 0.0627  | 0.5058  |
| k_Bacteria;p__Acidobacteria;c__iii1-8;                 | 0.0006    | 0.0000   | 0.0002 | 0.0002    | 0.0000   | 0.0000 | 0.0732  | 0.5058  |
| k_Bacteria;p__BRC1;c__PRR-11;                          | 0.0005    | 0.0000   | 0.0003 | 0.0001    | 0.0000   | 0.0001 | 0.1784  | 0.5505  |



|                                                    |        |        |        |        |        |        |        |        |
|----------------------------------------------------|--------|--------|--------|--------|--------|--------|--------|--------|
| k_Bacteria;p_Gemmatimonadetes;c_Gemm-5;            | 0.0005 | 0.0000 | 0.0002 | 0.0001 | 0.0000 | 0.0000 | 0.1318 | 0.5505 |
| k_Bacteria;p_Deferribacteres;c_Deferribacteres;    | 0.0005 | 0.0000 | 0.0002 | 0.0002 | 0.0000 | 0.0001 | 0.3958 | 0.6603 |
| k_Bacteria;p_Acidobacteria;c_Acidobacteriia;       | 0.0004 | 0.0000 | 0.0002 | 0.0001 | 0.0000 | 0.0001 | 0.1241 | 0.5505 |
| k_Bacteria;p_Chloroflexi;c_Thermomicrobia;         | 0.0005 | 0.0000 | 0.0002 | 0.0002 | 0.0000 | 0.0001 | 0.2763 | 0.5621 |
| k_Bacteria;p_Chloroflexi;c_Gitt-GS-136;            | 0.0003 | 0.0000 | 0.0002 | 0.0001 | 0.0000 | 0.0000 | 0.1967 | 0.5505 |
| k_Bacteria;p_Cyanobacteria;c_Chloroplast;          | 0.0005 | 0.0000 | 0.0001 | 0.0001 | 0.0000 | 0.0000 | 0.0714 | 0.5058 |
| k_Bacteria;p_Chloroflexi;c_Ellin6529;              | 0.0005 | 0.0000 | 0.0001 | 0.0001 | 0.0000 | 0.0001 | 0.0451 | 0.5058 |
| k_Bacteria;p_TM6;c_SJA-4;                          | 0.0002 | 0.0000 | 0.0002 | 0.0001 | 0.0000 | 0.0001 | 0.4687 | 0.7030 |
| k_Archaea;p_Crenarchaeota;c_Thaumarchaeota;        | 0.0003 | 0.0000 | 0.0001 | 0.0001 | 0.0000 | 0.0001 | 0.3095 | 0.5909 |
| k_Bacteria;p_Acidobacteria;c_[Chloracidobacteria]; | 0.0001 | 0.0000 | 0.0000 | 0.0002 | 0.0000 | 0.0002 | 0.5095 | 0.7134 |
| k_Bacteria;p_Nitrospirae;c_Nitrospira;             | 0.0001 | 0.0000 | 0.0000 | 0.0003 | 0.0000 | 0.0001 | 0.4213 | 0.6605 |
| k_Bacteria;p_Acidobacteria;c_Solibacteres;         | 0.0002 | 0.0000 | 0.0001 | 0.0001 | 0.0000 | 0.0001 | 0.2569 | 0.5582 |
| k_Bacteria;p_Actinobacteria;c_MB-A2-108;           | 0.0001 | 0.0000 | 0.0000 | 0.0002 | 0.0000 | 0.0001 | 0.4088 | 0.6603 |
| k_Bacteria;p_Bacteroidetes;c_[Rhodothermi];        | 0.0001 | 0.0000 | 0.0001 | 0.0000 | 0.0000 | 0.0000 | 0.2801 | 0.5621 |
| k_Bacteria;p_Verrucomicrobia;c_Opitutae;           | 0.0001 | 0.0000 | 0.0001 | 0.0000 | 0.0000 | 0.0000 | 0.1043 | 0.5473 |
| k_Bacteria;p_Actinobacteria;c_Acidimicrobiia;      | 0.0001 | 0.0000 | 0.0000 | 0.0001 | 0.0000 | 0.0000 | 0.7311 | 0.8838 |
| k_Bacteria;p_Synergistetes;c_Synergistia;          | 0.0000 | 0.0000 | 0.0000 | 0.0001 | 0.0000 | 0.0000 | 0.3314 | 0.6141 |
| k_Bacteria;p_Armatimonadetes;c_0319-6E2;           | 0.0000 | 0.0000 | 0.0000 | 0.0000 | 0.0000 | 0.0000 | 0.6518 | 0.8051 |
| k_Bacteria;p_Cyanobacteria;c_ML635J-21;            | 0.0001 | 0.0000 | 0.0000 | 0.0000 | 0.0000 | 0.0000 | 0.2301 | 0.5505 |
| k_Bacteria;p_Chlamydiae;c_Chlamydiia;              | 0.0001 | 0.0000 | 0.0000 | 0.0000 | 0.0000 | 0.0000 | 0.1373 | 0.5505 |
| k_Bacteria;p_Actinobacteria;c_Coriobacteriia;      | 0.0001 | 0.0000 | 0.0000 | 0.0000 | 0.0000 | 0.0000 | 0.5517 | 0.7241 |
| k_Bacteria;p_Bacteroidetes;c_Flavobacteriia;       | 0.0001 | 0.0000 | 0.0000 | 0.0000 | 0.0000 | 0.0000 | 0.1043 | 0.5473 |
| k_Bacteria;p_Lentisphaerae;c_[Lentisphaeria];      | 0.0000 | 0.0000 | 0.0000 | 0.0000 | 0.0000 | 0.0000 | 0.1894 | 0.5505 |
| k_Bacteria;p_Gemmatimonadetes;c_Gemm-2;            | 0.0000 | 0.0000 | 0.0000 | 0.0000 | 0.0000 | 0.0000 | 0.3727 | 0.6603 |
| k_Bacteria;p_TM7;c_TM7-1;                          | 0.0000 | 0.0000 | 0.0000 | 0.0000 | 0.0000 | 0.0000 | 0.5000 | 0.7134 |
| k_Bacteria;p_Planctomycetes;c_Phycisphaerae;       | 0.0000 | 0.0000 | 0.0000 | 0.0000 | 0.0000 | 0.0000 | 0.7435 | 0.8838 |
| k_Bacteria;p_AD3;c_ABS-6;                          | 0.0000 | 0.0000 | 0.0000 | 0.0000 | 0.0000 | 0.0000 | 1.0000 | 1.0000 |
| k_Bacteria;p_Planctomycetes;c_BD7-11;              | 0.0000 | 0.0000 | 0.0000 | 0.0000 | 0.0000 | 0.0000 | 1.0000 | 1.0000 |
| k_Bacteria;p_Chloroflexi;c_Dehalococcoidetes;      | 0.0000 | 0.0000 | 0.0000 | 0.0000 | 0.0000 | 0.0000 | 1.0000 | 1.0000 |
| k_Bacteria;p_Armatimonadetes;c_Chthonomonadetes;   | 0.0000 | 0.0000 | 0.0000 | 0.0000 | 0.0000 | 0.0000 | 1.0000 | 1.0000 |
| k_Bacteria;p_Acidobacteria;c_Sva0725;              | 0.0000 | 0.0000 | 0.0000 | 0.0000 | 0.0000 | 0.0000 | 1.0000 | 1.0000 |

---

|                                                 |        |        |        |        |        |        |        |        |
|-------------------------------------------------|--------|--------|--------|--------|--------|--------|--------|--------|
| k__Archaea;p__Euryarchaeota;c__Methanobacteria; | 0.0000 | 0.0000 | 0.0000 | 0.0000 | 0.0000 | 0.0000 | 1.0000 | 1.0000 |
| k__Bacteria;p__TM7;c__TM7-3;                    | 0.0000 | 0.0000 | 0.0000 | 0.0000 | 0.0000 | 0.0000 | 0.5000 | 0.7134 |
| Others                                          | 0.0020 | 0.0000 | 0.0006 | 0.0037 | 0.0000 | 0.0029 | 0.6282 | 0.7915 |

---

### Dataset 3 Statistical analysis of community composition in order level

| Taxa                                                                     | mean(NS1) | variance | STDEV  | mean(OS1) | variance | STDEV  | p value | q value |
|--------------------------------------------------------------------------|-----------|----------|--------|-----------|----------|--------|---------|---------|
| k_Bacteria;p_Firmicutes;c_Bacilli;o_Lactobacillales;                     | 0.1625    | 0.0158   | 0.0725 | 0.5096    | 0.0097   | 0.0570 | 0.0153  | 0.4780  |
| k_Bacteria;p_Firmicutes;c_Bacilli;o_Bacillales;                          | 0.1738    | 0.0078   | 0.0511 | 0.2023    | 0.0198   | 0.0812 | 0.8150  | 1.0000  |
| k_Bacteria;p_Proteobacteria;c_Alphaproteobacteria;o_Rhizobiales;         | 0.2174    | 0.0061   | 0.0449 | 0.0364    | 0.0019   | 0.0250 | 0.0191  | 0.4780  |
| k_Bacteria;p_Firmicutes;c_Clostridia;o_Clostridiales;                    | 0.1440    | 0.0077   | 0.0506 | 0.1220    | 0.0218   | 0.0853 | 0.8788  | 1.0000  |
| k_Bacteria;p_Bacteroidetes;c_Bacteroidia;o_Bacteroidales;                | 0.0568    | 0.0025   | 0.0291 | 0.0575    | 0.0026   | 0.0293 | 0.9803  | 1.0000  |
| k_Bacteria;p_Proteobacteria;c_Betaproteobacteria;o_Burkholderiales;      | 0.0475    | 0.0011   | 0.0189 | 0.0064    | 0.0000   | 0.0026 | 0.0761  | 0.5642  |
| k_Bacteria;p_Proteobacteria;c_Gammaproteobacteria;o_Pseudomonadales;     | 0.0301    | 0.0013   | 0.0209 | 0.0011    | 0.0000   | 0.0003 | 0.2242  | 0.5901  |
| k_Bacteria;p_Proteobacteria;c_Alphaproteobacteria;o_Rhodobacterales;     | 0.0313    | 0.0000   | 0.0025 | 0.0045    | 0.0000   | 0.0024 | 0.0011  | 0.1136  |
| k_Bacteria;p_Actinobacteria;c_Actinobacteria;o_Actinomycetales;          | 0.0170    | 0.0000   | 0.0015 | 0.0108    | 0.0002   | 0.0091 | 0.5855  | 0.8345  |
| k_Bacteria;p_Proteobacteria;c_Gammaproteobacteria;o_Enterobacteriales;   | 0.0121    | 0.0002   | 0.0074 | 0.0008    | 0.0000   | 0.0001 | 0.1749  | 0.5642  |
| k_Bacteria;p_Proteobacteria;c_Alphaproteobacteria;o_Sphingomonadales;    | 0.0198    | 0.0000   | 0.0030 | 0.0116    | 0.0001   | 0.0043 | 0.1655  | 0.5642  |
| k_Bacteria;p_Proteobacteria;c_Gammaproteobacteria;o_Aeromonadales;       | 0.0082    | 0.0001   | 0.0070 | 0.0015    | 0.0000   | 0.0008 | 0.4186  | 0.7094  |
| k_Bacteria;p_Proteobacteria;c_Gammaproteobacteria;o_Xanthomonadales;     | 0.0111    | 0.0001   | 0.0049 | 0.0015    | 0.0000   | 0.0006 | 0.0895  | 0.5642  |
| k_Bacteria;p_Proteobacteria;c_Alphaproteobacteria;o_Rhodospirillales;    | 0.0080    | 0.0000   | 0.0023 | 0.0098    | 0.0000   | 0.0031 | 0.6709  | 0.9066  |
| k_Bacteria;p_Proteobacteria;c_Deltaproteobacteria;o_Myxococcales;        | 0.0049    | 0.0000   | 0.0022 | 0.0009    | 0.0000   | 0.0006 | 0.1264  | 0.5642  |
| k_Bacteria;p_Proteobacteria;c_Alphaproteobacteria;o_RF32;                | 0.0051    | 0.0000   | 0.0026 | 0.0008    | 0.0000   | 0.0004 | 0.1560  | 0.5642  |
| k_Bacteria;p_Proteobacteria;c_Epsilonproteobacteria;o_Campylobacterales; | 0.0031    | 0.0000   | 0.0019 | 0.0023    | 0.0000   | 0.0013 | 0.7701  | 0.9873  |
| k_Bacteria;p_Fusobacteria;c_Fusobacteriia;o_Fusobacteriales;             | 0.0022    | 0.0000   | 0.0018 | 0.0004    | 0.0000   | 0.0003 | 0.3960  | 0.7094  |
| k_Bacteria;p_Proteobacteria;c_Gammaproteobacteria;o_Oceanospirillales;   | 0.0024    | 0.0000   | 0.0015 | 0.0018    | 0.0000   | 0.0015 | 0.8226  | 1.0000  |
| k_Bacteria;p_Proteobacteria;c_Alphaproteobacteria;o_Caulobacterales;     | 0.0037    | 0.0000   | 0.0007 | 0.0009    | 0.0000   | 0.0004 | 0.0214  | 0.4780  |
| k_Bacteria;p_Verrucomicrobia;c_[Spartobacteria];o_[Chthoniobacterales];  | 0.0021    | 0.0000   | 0.0009 | 0.0001    | 0.0000   | 0.0000 | 0.0773  | 0.5642  |
| k_Bacteria;p_Cyanobacteria;c_4C0d-2;o_YS2;                               | 0.0014    | 0.0000   | 0.0008 | 0.0003    | 0.0000   | 0.0002 | 0.2110  | 0.5901  |
| k_Bacteria;p_Firmicutes;c_Bacilli;o_Turicibacterales;                    | 0.0012    | 0.0000   | 0.0008 | 0.0013    | 0.0000   | 0.0007 | 0.9347  | 1.0000  |
| k_Bacteria;p_Planctomycetes;c_Planctomycetia;o_Pirellulales;             | 0.0013    | 0.0000   | 0.0007 | 0.0002    | 0.0000   | 0.0002 | 0.2052  | 0.5901  |
| k_Bacteria;p_Proteobacteria;c_Deltaproteobacteria;o_Desulfovibrionales;  | 0.0012    | 0.0000   | 0.0007 | 0.0007    | 0.0000   | 0.0004 | 0.6263  | 0.8580  |
| k_Bacteria;p_Firmicutes;c_Erysipelotrichi;o_Erysipelotrichales;          | 0.0013    | 0.0000   | 0.0007 | 0.0007    | 0.0000   | 0.0004 | 0.5317  | 0.7892  |
| k_Bacteria;p_Bacteroidetes;c_[Saprospirae];o_[Saprospirales];            | 0.0008    | 0.0000   | 0.0007 | 0.0001    | 0.0000   | 0.0001 | 0.4073  | 0.7094  |
| k_Bacteria;p_Acidobacteria;c_Acidobacteria-6;o_iii1-15;                  | 0.0013    | 0.0000   | 0.0004 | 0.0006    | 0.0000   | 0.0002 | 0.1498  | 0.5642  |
| k_Bacteria;p_Bacteroidetes;c_Cytophagia;o_Cytophagales;                  | 0.0006    | 0.0000   | 0.0004 | 0.0000    | 0.0000   | 0.0000 | 0.2420  | 0.5902  |

|                                                                       |        |        |        |        |        |        |        |        |
|-----------------------------------------------------------------------|--------|--------|--------|--------|--------|--------|--------|--------|
| k_Bacteria;p_Planctomycetes;c_Planctomycetia;o_Planctomycetales;      | 0.0007 | 0.0000 | 0.0004 | 0.0002 | 0.0000 | 0.0001 | 0.2182 | 0.5901 |
| k_Bacteria;p_Verrucomicrobia;c_Verrucomicrobiae;o_Verrucomicrobiales; | 0.0009 | 0.0000 | 0.0004 | 0.0003 | 0.0000 | 0.0002 | 0.2386 | 0.5902 |
| k_Bacteria;p_Proteobacteria;c_Gammaproteobacteria;o_Alteromonadales;  | 0.0007 | 0.0000 | 0.0003 | 0.0005 | 0.0000 | 0.0003 | 0.7328 | 0.9658 |
| k_Bacteria;p_Bacteroidetes;c_Sphingobacteriia;o_Sphingobacteriales;   | 0.0007 | 0.0000 | 0.0003 | 0.0001 | 0.0000 | 0.0000 | 0.1521 | 0.5642 |
| k_Bacteria;p_Chloroflexi;c_Anaerolineae;o_GCA004;                     | 0.0005 | 0.0000 | 0.0004 | 0.0000 | 0.0000 | 0.0000 | 0.2861 | 0.6358 |
| k_Bacteria;p_Verrucomicrobia;c_[Pedosphaerae];o_[Pedosphaerales];     | 0.0004 | 0.0000 | 0.0003 | 0.0001 | 0.0000 | 0.0001 | 0.3248 | 0.6771 |
| k_Bacteria;p_Tenericutes;c_Mollicutes;o_RF39;                         | 0.0006 | 0.0000 | 0.0003 | 0.0004 | 0.0000 | 0.0002 | 0.5962 | 0.8345 |
| k_Bacteria;p_Proteobacteria;c_Gammaproteobacteria;o_Legionellales;    | 0.0006 | 0.0000 | 0.0002 | 0.0003 | 0.0000 | 0.0003 | 0.6008 | 0.8345 |
| k_Bacteria;p_Acidobacteria;c_iii1-8;o_DS-18;                          | 0.0006 | 0.0000 | 0.0002 | 0.0002 | 0.0000 | 0.0000 | 0.0739 | 0.5642 |
| k_Bacteria;p_Proteobacteria;c_Betaproteobacteria;o_MND1;              | 0.0006 | 0.0000 | 0.0002 | 0.0002 | 0.0000 | 0.0001 | 0.1107 | 0.5642 |
| k_Bacteria;p_Proteobacteria;c_Betaproteobacteria;o_Rhodocyclales;     | 0.0006 | 0.0000 | 0.0002 | 0.0002 | 0.0000 | 0.0002 | 0.2230 | 0.5901 |
| k_Bacteria;p_Derribacteres;c_Derribacteres;o_Derribacterales;         | 0.0005 | 0.0000 | 0.0002 | 0.0002 | 0.0000 | 0.0001 | 0.4008 | 0.7094 |
| k_Bacteria;p_Actinobacteria;c_Thermoleophilia;o_Solirubrobacteriales; | 0.0006 | 0.0000 | 0.0001 | 0.0002 | 0.0000 | 0.0001 | 0.0239 | 0.4780 |
| k_Bacteria;p_Acidobacteria;c_Acidobacteriia;o_Acidobacteriales;       | 0.0004 | 0.0000 | 0.0002 | 0.0001 | 0.0000 | 0.0001 | 0.1167 | 0.5642 |
| k_Bacteria;p_Cyanobacteria;c_Chloroplast;o_Streptophyta;              | 0.0005 | 0.0000 | 0.0001 | 0.0001 | 0.0000 | 0.0000 | 0.0727 | 0.5642 |
| k_Bacteria;p_Chloroflexi;c_Thermomicrobia;o_JG30-KF-CM45;             | 0.0005 | 0.0000 | 0.0002 | 0.0002 | 0.0000 | 0.0001 | 0.2673 | 0.6103 |
| k_Bacteria;p_Proteobacteria;c_Betaproteobacteria;o_SC-I-84;           | 0.0003 | 0.0000 | 0.0002 | 0.0001 | 0.0000 | 0.0001 | 0.2205 | 0.5901 |
| k_Bacteria;p_Proteobacteria;c_Betaproteobacteria;o_Neisseriales;      | 0.0003 | 0.0000 | 0.0001 | 0.0001 | 0.0000 | 0.0001 | 0.1178 | 0.5642 |
| k_Archaea;p_Crenarchaeota;c_Thaumarchaeota;o_Nitrososphaerales;       | 0.0003 | 0.0000 | 0.0001 | 0.0001 | 0.0000 | 0.0001 | 0.2969 | 0.6455 |
| k_Bacteria;p_Proteobacteria;c_Betaproteobacteria;o_Ellin6067;         | 0.0003 | 0.0000 | 0.0001 | 0.0002 | 0.0000 | 0.0001 | 0.3670 | 0.6837 |
| k_Bacteria;p_Acidobacteria;c_[Chloracidobacteria];o_RB41;             | 0.0001 | 0.0000 | 0.0000 | 0.0002 | 0.0000 | 0.0002 | 0.5110 | 0.7742 |
| k_Bacteria;p_Actinobacteria;c_Thermoleophilia;o_Gaiellales;           | 0.0003 | 0.0000 | 0.0001 | 0.0002 | 0.0000 | 0.0001 | 0.8127 | 1.0000 |
| k_Bacteria;p_Nitrospirae;c_Nitrospira;o_Nitrospirales;                | 0.0001 | 0.0000 | 0.0000 | 0.0003 | 0.0000 | 0.0001 | 0.4272 | 0.7120 |
| k_Bacteria;p_Actinobacteria;c_Actinobacteria;o_Bifidobacteriales;     | 0.0002 | 0.0000 | 0.0001 | 0.0000 | 0.0000 | 0.0000 | 0.1595 | 0.5642 |
| k_Bacteria;p_Proteobacteria;c_Gammaproteobacteria;o_Thiotrichales;    | 0.0002 | 0.0000 | 0.0001 | 0.0000 | 0.0000 | 0.0000 | 0.1322 | 0.5642 |
| k_Bacteria;p_Proteobacteria;c_Alphaproteobacteria;o_Ellin329;         | 0.0002 | 0.0000 | 0.0001 | 0.0000 | 0.0000 | 0.0000 | 0.1276 | 0.5642 |
| k_Bacteria;p_Acidobacteria;c_Solibacteres;o_Solibacterales;           | 0.0002 | 0.0000 | 0.0001 | 0.0001 | 0.0000 | 0.0001 | 0.2551 | 0.6073 |
| k_Bacteria;p_Proteobacteria;c_Gammaproteobacteria;o_Vibrionales;      | 0.0002 | 0.0000 | 0.0001 | 0.0001 | 0.0000 | 0.0001 | 0.8630 | 1.0000 |
| k_Bacteria;p_Proteobacteria;c_Betaproteobacteria;o_Methylophilales;   | 0.0002 | 0.0000 | 0.0001 | 0.0000 | 0.0000 | 0.0000 | 0.0604 | 0.5642 |
| k_Bacteria;p_Proteobacteria;c_Gammaproteobacteria;o_Pasteurellales;   | 0.0002 | 0.0000 | 0.0001 | 0.0000 | 0.0000 | 0.0000 | 0.2321 | 0.5902 |
| k_Bacteria;p_Actinobacteria;c_MB-A2-108;o_0319-7L14;                  | 0.0001 | 0.0000 | 0.0000 | 0.0002 | 0.0000 | 0.0001 | 0.4121 | 0.7094 |

|                                                                           |        |        |        |        |        |        |        |        |
|---------------------------------------------------------------------------|--------|--------|--------|--------|--------|--------|--------|--------|
| k_Bacteria;p_Bacteroidetes;c_[Rhodothermi];o_[Rhodothermales];            | 0.0001 | 0.0000 | 0.0001 | 0.0000 | 0.0000 | 0.0000 | 0.2685 | 0.6103 |
| k_Bacteria;p_Planctomycetes;c_Planctomycetia;o_Gemmatales;                | 0.0001 | 0.0000 | 0.0001 | 0.0000 | 0.0000 | 0.0000 | 0.1288 | 0.5642 |
| k_Bacteria;p_Firmicutes;c_Bacilli;o_Haloplasmatales;                      | 0.0001 | 0.0000 | 0.0000 | 0.0000 | 0.0000 | 0.0000 | 0.0680 | 0.5642 |
| k_Bacteria;p_Verrucomicrobia;c_Opitutae;o_Opitutales;                     | 0.0001 | 0.0000 | 0.0001 | 0.0000 | 0.0000 | 0.0000 | 0.0962 | 0.5642 |
| k_Bacteria;p_Actinobacteria;c_Acidimicrobiia;o_Acidimicrobiales;          | 0.0001 | 0.0000 | 0.0000 | 0.0001 | 0.0000 | 0.0000 | 0.7366 | 0.9658 |
| k_Bacteria;p_Proteobacteria;c_Alphaproteobacteria;o_Rickettsiales;        | 0.0001 | 0.0000 | 0.0001 | 0.0000 | 0.0000 | 0.0000 | 0.3368 | 0.6771 |
| k_Bacteria;p_Proteobacteria;c_Deltaproteobacteria;o_Bdellovibrionales;    | 0.0000 | 0.0000 | 0.0000 | 0.0000 | 0.0000 | 0.0000 | 0.3692 | 0.6837 |
| k_Bacteria;p_Synergistetes;c_Synergistia;o_Synergistales;                 | 0.0000 | 0.0000 | 0.0000 | 0.0001 | 0.0000 | 0.0000 | 0.3296 | 0.6771 |
| k_Bacteria;p_Firmicutes;c_Clostridia;o_OPB54;                             | 0.0001 | 0.0000 | 0.0000 | 0.0000 | 0.0000 | 0.0000 | 0.5367 | 0.7892 |
| k_Bacteria;p_Tenericutes;c_Mollicutes;o_Anaeroplasmatales;                | 0.0000 | 0.0000 | 0.0000 | 0.0000 | 0.0000 | 0.0000 | 0.3692 | 0.6837 |
| k_Bacteria;p_Actinobacteria;c_Coriobacteriia;o_Coriobacteriales;          | 0.0001 | 0.0000 | 0.0000 | 0.0000 | 0.0000 | 0.0000 | 0.5519 | 0.7998 |
| k_Bacteria;p_Chlamydiae;c_Chlamydiia;o_Chlamydiales;                      | 0.0001 | 0.0000 | 0.0000 | 0.0000 | 0.0000 | 0.0000 | 0.1322 | 0.5642 |
| k_Bacteria;p_Gemmatimonadetes;c_Gemmatimonadetes;o_KD8-87;                | 0.0001 | 0.0000 | 0.0000 | 0.0000 | 0.0000 | 0.0000 | 0.1678 | 0.5642 |
| k_Bacteria;p_Bacteroidetes;c_Flavobacteriia;o_Flavobacteriales;           | 0.0001 | 0.0000 | 0.0000 | 0.0000 | 0.0000 | 0.0000 | 0.0962 | 0.5642 |
| k_Bacteria;p_Gemmatimonadetes;c_Gemmatimonadetes;o_Gemmatimonadales;      | 0.0001 | 0.0000 | 0.0000 | 0.0000 | 0.0000 | 0.0000 | 0.3453 | 0.6771 |
| k_Bacteria;p_Lentisphaerae;c_[Lentisphaeria];o_Victivallales;             | 0.0000 | 0.0000 | 0.0000 | 0.0000 | 0.0000 | 0.0000 | 0.1809 | 0.5653 |
| k_Bacteria;p_Proteobacteria;c_Betaproteobacteria;o_IS-44;                 | 0.0000 | 0.0000 | 0.0000 | 0.0000 | 0.0000 | 0.0000 | 0.3453 | 0.6771 |
| k_Bacteria;p_Proteobacteria;c_Deltaproteobacteria;o_Syntrophobacteriales; | 0.0000 | 0.0000 | 0.0000 | 0.0000 | 0.0000 | 0.0000 | 0.7437 | 0.9658 |
| k_Bacteria;p_Planctomycetes;c_Planctomycetia;o_B97;                       | 0.0000 | 0.0000 | 0.0000 | 0.0000 | 0.0000 | 0.0000 | 0.5000 | 0.7692 |
| k_Bacteria;p_Proteobacteria;c_Deltaproteobacteria;o_Spirobacillales;      | 0.0000 | 0.0000 | 0.0000 | 0.0000 | 0.0000 | 0.0000 | 0.5000 | 0.7692 |
| k_Bacteria;p_Proteobacteria;c_Deltaproteobacteria;o_MIZ46;                | 0.0000 | 0.0000 | 0.0000 | 0.0000 | 0.0000 | 0.0000 | 0.5000 | 0.7692 |
| k_Bacteria;p_Planctomycetes;c_Phycisphaerae;o_WD2101;                     | 0.0000 | 0.0000 | 0.0000 | 0.0000 | 0.0000 | 0.0000 | 1.0000 | 1.0000 |
| k_Bacteria;p_Proteobacteria;c_Gammaproteobacteria;o_Chromatiales;         | 0.0000 | 0.0000 | 0.0000 | 0.0000 | 0.0000 | 0.0000 | 0.1322 | 0.5642 |
| k_Bacteria;p_Proteobacteria;c_Alphaproteobacteria;o_BD7-3;                | 0.0000 | 0.0000 | 0.0000 | 0.0000 | 0.0000 | 0.0000 | 0.5000 | 0.7692 |
| k_Bacteria;p_Acidobacteria;c_Acidobacteria-6;o_CCU21;                     | 0.0000 | 0.0000 | 0.0000 | 0.0000 | 0.0000 | 0.0000 | 0.5000 | 0.7692 |
| k_Bacteria;p_Chloroflexi;c_Anaerolineae;o_CFB-26;                         | 0.0000 | 0.0000 | 0.0000 | 0.0000 | 0.0000 | 0.0000 | 1.0000 | 1.0000 |
| k_Bacteria;p_Gemmatimonadetes;c_Gemmatimonadetes;o_N1423WL;               | 0.0000 | 0.0000 | 0.0000 | 0.0000 | 0.0000 | 0.0000 | 1.0000 | 1.0000 |
| k_Bacteria;p_Acidobacteria;c_Sva0725;o_Sva0725;                           | 0.0000 | 0.0000 | 0.0000 | 0.0000 | 0.0000 | 0.0000 | 1.0000 | 1.0000 |
| k_Bacteria;p_Proteobacteria;c_Betaproteobacteria;o_SBla14;                | 0.0000 | 0.0000 | 0.0000 | 0.0000 | 0.0000 | 0.0000 | 1.0000 | 1.0000 |
| k_Bacteria;p_Proteobacteria;c_Deltaproteobacteria;o_Desulfarcucales;      | 0.0000 | 0.0000 | 0.0000 | 0.0000 | 0.0000 | 0.0000 | 1.0000 | 1.0000 |
| k_Bacteria;p_Armatimonadetes;c_Chthonomonadetes;o_Chthonomonadales;       | 0.0000 | 0.0000 | 0.0000 | 0.0000 | 0.0000 | 0.0000 | 1.0000 | 1.0000 |

|                                                                          |        |        |        |        |        |        |        |        |
|--------------------------------------------------------------------------|--------|--------|--------|--------|--------|--------|--------|--------|
| k__Archaea;p__Euryarchaeota;c__Methanobacteria;o__Methanobacteriales;    | 0.0000 | 0.0000 | 0.0000 | 0.0000 | 0.0000 | 0.0000 | 1.0000 | 1.0000 |
| k__Bacteria;p__Proteobacteria;c__Deltaproteobacteria;o__NB1-j;           | 0.0000 | 0.0000 | 0.0000 | 0.0000 | 0.0000 | 0.0000 | 1.0000 | 1.0000 |
| k__Bacteria;p__Planctomycetes;c__Phycisphaerae;o__Phycisphaerales;       | 0.0000 | 0.0000 | 0.0000 | 0.0000 | 0.0000 | 0.0000 | 1.0000 | 1.0000 |
| k__Bacteria;p__Chloroflexi;c__Anaerolineae;o__Anaerolineales;            | 0.0000 | 0.0000 | 0.0000 | 0.0000 | 0.0000 | 0.0000 | 1.0000 | 1.0000 |
| k__Bacteria;p__Chloroflexi;c__Dehalococcoidetes;o__Dehalococcoidales;    | 0.0000 | 0.0000 | 0.0000 | 0.0000 | 0.0000 | 0.0000 | 1.0000 | 1.0000 |
| k__Bacteria;p__Firmicutes;c__Bacilli;o__Gemellales;                      | 0.0000 | 0.0000 | 0.0000 | 0.0000 | 0.0000 | 0.0000 | 1.0000 | 1.0000 |
| k__Bacteria;p__Chloroflexi;c__Thermomicrobia;o__AKYG1722;                | 0.0000 | 0.0000 | 0.0000 | 0.0000 | 0.0000 | 0.0000 | 1.0000 | 1.0000 |
| k__Bacteria;p__Proteobacteria;c__Gammaproteobacteria;o__Methylococcales; | 0.0000 | 0.0000 | 0.0000 | 0.0000 | 0.0000 | 0.0000 | 1.0000 | 1.0000 |
| Others                                                                   | 0.0136 | 0.0000 | 0.0018 | 0.0075 | 0.0000 | 0.0035 | 0.1727 | 0.5642 |

## Dataset 4 Statistical analysis of community composition in genus level

| Taxa                                                                                                           | mean(NS1) | variance | STDEV  | mean(OS1) | variance | STDEV  | p value | q value |
|----------------------------------------------------------------------------------------------------------------|-----------|----------|--------|-----------|----------|--------|---------|---------|
| k__Bacteria;p__Firmicutes;c__Bacilli;o__Lactobacillales;f__Lactobacillaceae;g__Lactobacillus;                  | 0.1561    | 0.0151   | 0.0710 | 0.5075    | 0.0097   | 0.0568 | 0.0110  | 0.5807  |
| k__Bacteria;p__Firmicutes;c__Clostridia;o__Clostridiales;f__Ruminococcaceae;g__Ruminococcus;                   | 0.0673    | 0.0043   | 0.0381 | 0.0577    | 0.0092   | 0.0552 | 0.9352  | 1.0000  |
| k__Bacteria;p__Proteobacteria;c__Alphaproteobacteria;o__Rhizobiales;f__Brucellaceae;g__Ochrobactrum;           | 0.0891    | 0.0040   | 0.0363 | 0.0079    | 0.0000   | 0.0039 | 0.0504  | 0.6675  |
| k__Bacteria;p__Firmicutes;c__Bacilli;o__Bacillales;f__Planococcaceae;g__Sporosarcina;                          | 0.0238    | 0.0005   | 0.0126 | 0.0025    | 0.0000   | 0.0010 | 0.1315  | 0.6675  |
| k__Bacteria;p__Proteobacteria;c__Alphaproteobacteria;o__Rhizobiales;f__Hyphomicrobiaceae;g__Devosia;           | 0.0177    | 0.0004   | 0.0115 | 0.0015    | 0.0000   | 0.0003 | 0.2071  | 0.6736  |
| k__Bacteria;p__Firmicutes;c__Bacilli;o__Bacillales;f__Bacillaceae;g__Bacillus;                                 | 0.0212    | 0.0001   | 0.0061 | 0.0137    | 0.0004   | 0.0115 | 0.6998  | 1.0000  |
| k__Bacteria;p__Proteobacteria;c__Betaproteobacteria;o__Burkholderiales;f__Alcaligenaceae;g__Achromobacter;     | 0.0178    | 0.0002   | 0.0089 | 0.0006    | 0.0000   | 0.0001 | 0.0786  | 0.6675  |
| k__Bacteria;p__Proteobacteria;c__Alphaproteobacteria;o__Rhodobacterales;f__Rhodobacteraceae;g__Paracoccus;     | 0.0300    | 0.0000   | 0.0025 | 0.0038    | 0.0000   | 0.0024 | 0.0020  | 0.1387  |
| k__Bacteria;p__Proteobacteria;c__Betaproteobacteria;o__Burkholderiales;f__Alcaligenaceae;g__Pigmentiphaga;     | 0.0115    | 0.0003   | 0.0106 | 0.0004    | 0.0000   | 0.0002 | 0.3577  | 0.7953  |
| k__Bacteria;p__Proteobacteria;c__Gammaproteobacteria;o__Pseudomonadales;f__Pseudomonadaceae;g__Pseudomonas;    | 0.0142    | 0.0001   | 0.0069 | 0.0005    | 0.0000   | 0.0000 | 0.0726  | 0.6675  |
| k__Bacteria;p__Proteobacteria;c__Gammaproteobacteria;o__Aeromonadales;f__Aeromonadaceae;g__Aeromonas;          | 0.0082    | 0.0001   | 0.0070 | 0.0015    | 0.0000   | 0.0008 | 0.4678  | 0.8256  |
| k__Bacteria;p__Proteobacteria;c__Betaproteobacteria;o__Burkholderiales;f__Alcaligenaceae;g__Denitrobacter;     | 0.0063    | 0.0001   | 0.0058 | 0.0001    | 0.0000   | 0.0000 | 0.3202  | 0.7571  |
| k__Bacteria;p__Firmicutes;c__Clostridia;o__Clostridiales;f__Eubacteriaceae;g__Garciglia;                       | 0.0080    | 0.0001   | 0.0045 | 0.0021    | 0.0000   | 0.0017 | 0.2551  | 0.7024  |
| k__Bacteria;p__Proteobacteria;c__Alphaproteobacteria;o__Rhizobiales;f__Rhizobiaceae;g__Amorphomonas;           | 0.0088    | 0.0000   | 0.0041 | 0.0019    | 0.0000   | 0.0017 | 0.1457  | 0.6675  |
| k__Bacteria;p__Proteobacteria;c__Alphaproteobacteria;o__Rhodospirillales;f__Acetobacteraceae;g__Acetobacter;   | 0.0009    | 0.0000   | 0.0004 | 0.0081    | 0.0000   | 0.0040 | 0.1060  | 0.6675  |
| k__Bacteria;p__Actinobacteria;c__Actinobacteria;o__Actinomycetales;f__Corynebacteriaceae;g__Corynebacterium;   | 0.0011    | 0.0000   | 0.0005 | 0.0040    | 0.0000   | 0.0038 | 0.5807  | 0.9187  |
| k__Bacteria;p__Proteobacteria;c__Alphaproteobacteria;o__Sphingomonadales;f__Sphingomonadaceae;g__Sphingomonas; | 0.0058    | 0.0000   | 0.0027 | 0.0019    | 0.0000   | 0.0007 | 0.2039  | 0.6736  |
| k__Bacteria;p__Firmicutes;c__Bacilli;o__Bacillales;f__Planococcaceae;g__Solibacillus;                          | 0.0037    | 0.0000   | 0.0033 | 0.0002    | 0.0000   | 0.0001 | 0.3350  | 0.7571  |
| k__Bacteria;p__Firmicutes;c__Clostridia;o__Clostridiales;f__Ruminococcaceae;g__Oscillospira;                   | 0.0046    | 0.0000   | 0.0029 | 0.0026    | 0.0000   | 0.0014 | 0.6750  | 0.9937  |
| k__Bacteria;p__Proteobacteria;c__Alphaproteobacteria;o__Sphingomonadales;f__Sphingomonadaceae;g__Kaistobacter; | 0.0047    | 0.0000   | 0.0008 | 0.0061    | 0.0000   | 0.0029 | 0.7537  | 1.0000  |
| k__Bacteria;p__Bacteroidetes;c__Bacteroidia;o__Bacteroidales;f__Bacteroidaceae;g__Bacteroides;                 | 0.0044    | 0.0000   | 0.0026 | 0.0039    | 0.0000   | 0.0024 | 0.9400  | 1.0000  |
| k__Bacteria;p__Proteobacteria;c__Alphaproteobacteria;o__Rhizobiales;f__Hyphomicrobiaceae;g__Rhodoplanes;       | 0.0052    | 0.0000   | 0.0018 | 0.0029    | 0.0000   | 0.0025 | 0.5787  | 0.9187  |
| k__Bacteria;p__Proteobacteria;c__Gammaproteobacteria;o__Xanthomonadales;f__Xanthomonadaceae;g__Luteimonas;     | 0.0038    | 0.0000   | 0.0019 | 0.0004    | 0.0000   | 0.0002 | 0.0954  | 0.6675  |
| k__Bacteria;p__Proteobacteria;c__Gammaproteobacteria;o__Pseudomonadales;f__Moraxellaceae;g__Acinetobacter;     | 0.0025    | 0.0000   | 0.0021 | 0.0003    | 0.0000   | 0.0001 | 0.3189  | 0.7571  |
| k__Bacteria;p__Proteobacteria;c__Gammaproteobacteria;o__Xanthomonadales;f__Sinobacteraceae;g__Steriodobacter;  | 0.0031    | 0.0000   | 0.0018 | 0.0004    | 0.0000   | 0.0003 | 0.1820  | 0.6736  |
| k__Bacteria;p__Proteobacteria;c__Alphaproteobacteria;o__Rhizobiales;f__Bradyrhizobiaceae;g__Balneimonas;       | 0.0043    | 0.0000   | 0.0015 | 0.0016    | 0.0000   | 0.0012 | 0.2222  | 0.6864  |
| k__Bacteria;p__Fusobacteria;c__Fusobacteriia;o__Fusobacteriales;f__Fusobacteriaceae;g__Cetobacterium;          | 0.0022    | 0.0000   | 0.0018 | 0.0004    | 0.0000   | 0.0003 | 0.4489  | 0.8256  |
| k__Bacteria;p__Actinobacteria;c__Actinobacteria;o__Actinomycetales;f__Pseudonocardaceae;g__Thermocrispum;      | 0.0026    | 0.0000   | 0.0014 | 0.0020    | 0.0000   | 0.0018 | 0.8515  | 1.0000  |
| k__Bacteria;p__Proteobacteria;c__Deltaproteobacteria;o__Myxococcales;f__Myxococcaceae;g__Anaeromyxobacter;     | 0.0031    | 0.0000   | 0.0015 | 0.0005    | 0.0000   | 0.0004 | 0.1334  | 0.6675  |

|                                                                                                                        |        |        |        |        |        |        |        |        |
|------------------------------------------------------------------------------------------------------------------------|--------|--------|--------|--------|--------|--------|--------|--------|
| k__Bacteria;p__Firmicutes;c__Clostridia;o__Clostridiales;f__Lachnospiraceae;g__Coproccoccus;                           | 0.0021 | 0.0000 | 0.0016 | 0.0006 | 0.0000 | 0.0003 | 0.4839 | 0.8256 |
| k__Bacteria;p__Proteobacteria;c__Gammaproteobacteria;o__Enterobacteriales;f__Enterobacteriaceae;g__Escherichia;        | 0.0027 | 0.0000 | 0.0013 | 0.0003 | 0.0000 | 0.0002 | 0.0947 | 0.6675 |
| k__Bacteria;p__Proteobacteria;c__Gammaproteobacteria;o__Oceanospirillales;f__Halomonadaceae;g__Halomonas;              | 0.0023 | 0.0000 | 0.0015 | 0.0018 | 0.0000 | 0.0015 | 0.8769 | 1.0000 |
| k__Bacteria;p__Bacteroidetes;c__Bacteroidia;o__Bacteroidales;f__[Paraprevotellaceae];g__[Prevotella];                  | 0.0022 | 0.0000 | 0.0012 | 0.0021 | 0.0000 | 0.0016 | 0.9707 | 1.0000 |
| k__Bacteria;p__Firmicutes;c__Clostridia;o__Clostridiales;f__Clostridiaceae;g__Clostridium;                             | 0.0028 | 0.0000 | 0.0012 | 0.0009 | 0.0000 | 0.0005 | 0.1549 | 0.6675 |
| k__Bacteria;p__Bacteroidetes;c__Bacteroidia;o__Bacteroidales;f__Porphyromonadaceae;g__Parabacteroides;                 | 0.0025 | 0.0000 | 0.0014 | 0.0015 | 0.0000 | 0.0007 | 0.6442 | 0.9615 |
| k__Bacteria;p__Proteobacteria;c__Alphaproteobacteria;o__Rhizobiales;f__Phyllobacteriaceae;g__Chelativorans;            | 0.0044 | 0.0000 | 0.0003 | 0.0017 | 0.0000 | 0.0015 | 0.1111 | 0.6675 |
| k__Bacteria;p__Proteobacteria;c__Epsilonproteobacteria;o__Campylobacteriales;f__Helicobacteraceae;g__Helicobacter;     | 0.0022 | 0.0000 | 0.0014 | 0.0019 | 0.0000 | 0.0011 | 0.9001 | 1.0000 |
| k__Bacteria;p__Firmicutes;c__Bacilli;o__Bacillales;f__Paenibacillaceae;g__Paenibacillus;                               | 0.0024 | 0.0000 | 0.0010 | 0.0004 | 0.0000 | 0.0002 | 0.0638 | 0.6675 |
| k__Bacteria;p__Bacteroidetes;c__Bacteroidia;o__Bacteroidales;f__[Odoribacteraceae];g__Odoribacter;                     | 0.0017 | 0.0000 | 0.0013 | 0.0009 | 0.0000 | 0.0005 | 0.7213 | 1.0000 |
| k__Bacteria;p__Proteobacteria;c__Betaproteobacteria;o__Burkholderiales;f__Alcaligenaceae;g__Sutterella;                | 0.0021 | 0.0000 | 0.0011 | 0.0015 | 0.0000 | 0.0008 | 0.7743 | 1.0000 |
| k__Bacteria;p__Actinobacteria;c__Actinobacteria;o__Actinomycetales;f__Pseudonocardiaceae;g__Saccharopolyspora;         | 0.0007 | 0.0000 | 0.0003 | 0.0011 | 0.0000 | 0.0011 | 0.8106 | 1.0000 |
| k__Bacteria;p__Firmicutes;c__Clostridia;o__Clostridiales;f__Caldicoprobacteraceae;g__Caldicoprobacter;                 | 0.0015 | 0.0000 | 0.0009 | 0.0001 | 0.0000 | 0.0000 | 0.1752 | 0.6736 |
| k__Bacteria;p__Proteobacteria;c__Alphaproteobacteria;o__Rhizobiales;f__Rhizobiaceae;g__Agrobacterium;                  | 0.0013 | 0.0000 | 0.0009 | 0.0002 | 0.0000 | 0.0001 | 0.2420 | 0.7011 |
| k__Bacteria;p__Firmicutes;c__Bacilli;o__Turicibacteriales;f__Turicibacteraceae;g__Turicibacter;                        | 0.0012 | 0.0000 | 0.0008 | 0.0013 | 0.0000 | 0.0007 | 0.9499 | 1.0000 |
| k__Bacteria;p__Actinobacteria;c__Actinobacteria;o__Actinomycetales;f__Nocardiaceae;g__Rhodococcus;                     | 0.0015 | 0.0000 | 0.0007 | 0.0004 | 0.0000 | 0.0004 | 0.1970 | 0.6736 |
| k__Bacteria;p__Firmicutes;c__Bacilli;o__Bacillales;f__Thermoactinomycetaceae;g__Thermoactinomyces;                     | 0.0005 | 0.0000 | 0.0001 | 0.0009 | 0.0000 | 0.0007 | 0.7206 | 1.0000 |
| k__Bacteria;p__Proteobacteria;c__Alphaproteobacteria;o__Rhizobiales;f__Methylocystaceae;g__Pleomorphomonas;            | 0.0009 | 0.0000 | 0.0007 | 0.0001 | 0.0000 | 0.0000 | 0.2614 | 0.7104 |
| k__Bacteria;p__Actinobacteria;c__Actinobacteria;o__Actinomycetales;f__Mycobacteriaceae;g__Mycobacterium;               | 0.0013 | 0.0000 | 0.0005 | 0.0006 | 0.0000 | 0.0005 | 0.4464 | 0.8256 |
| k__Bacteria;p__Firmicutes;c__Clostridia;o__Clostridiales;f__[Tissierellaceae];g__Sporanaerobacter;                     | 0.0009 | 0.0000 | 0.0007 | 0.0000 | 0.0000 | 0.0000 | 0.2513 | 0.7011 |
| k__Bacteria;p__Proteobacteria;c__Alphaproteobacteria;o__Caulobacteriales;f__Caulobacteraceae;g__Phenylobacterium;      | 0.0019 | 0.0000 | 0.0001 | 0.0004 | 0.0000 | 0.0001 | 0.0013 | 0.1353 |
| k__Bacteria;p__Firmicutes;c__Clostridia;o__Clostridiales;f__Lachnospiraceae;g__[Ruminococcus];                         | 0.0008 | 0.0000 | 0.0006 | 0.0003 | 0.0000 | 0.0002 | 0.5261 | 0.8515 |
| k__Bacteria;p__Actinobacteria;c__Actinobacteria;o__Actinomycetales;f__Streptomycetaceae;g__Streptomyces;               | 0.0010 | 0.0000 | 0.0004 | 0.0003 | 0.0000 | 0.0001 | 0.1432 | 0.6675 |
| k__Bacteria;p__Bacteroidetes;c__Bacteroidia;o__Bacteroidales;f__Prevotellaceae;g__Prevotella;                          | 0.0008 | 0.0000 | 0.0005 | 0.0004 | 0.0000 | 0.0002 | 0.5666 | 0.9099 |
| k__Bacteria;p__Actinobacteria;c__Actinobacteria;o__Actinomycetales;f__Promicromonosporaceae;g__Cellulosimicrobi<br>um; | 0.0013 | 0.0000 | 0.0003 | 0.0002 | 0.0000 | 0.0001 | 0.0196 | 0.5935 |
| k__Bacteria;p__Proteobacteria;c__Alphaproteobacteria;o__Sphingomonadales;f__Erythrobacteraceae;g__Lutibacterium;       | 0.0010 | 0.0000 | 0.0004 | 0.0001 | 0.0000 | 0.0000 | 0.0455 | 0.6675 |
| k__Bacteria;p__Proteobacteria;c__Alphaproteobacteria;o__Rhodospirillales;f__Rhodospirillaceae;g__Phaeosporillum;       | 0.0007 | 0.0000 | 0.0005 | 0.0000 | 0.0000 | 0.0000 | 0.2450 | 0.7011 |
| k__Bacteria;p__Actinobacteria;c__Actinobacteria;o__Actinomycetales;f__Nocardiaceae;g__Nocardia;                        | 0.0006 | 0.0000 | 0.0005 | 0.0001 | 0.0000 | 0.0000 | 0.2790 | 0.7394 |
| k__Bacteria;p__Firmicutes;c__Erysipelotrichi;o__Erysipelotrichales;f__Erysipelotrichaceae;g__Allobaculum;              | 0.0006 | 0.0000 | 0.0004 | 0.0005 | 0.0000 | 0.0003 | 0.8282 | 1.0000 |
| k__Bacteria;p__Planctomycetes;c__Planctomycetia;o__Planctomycetales;f__Planctomycetaceae;g__Planctomyces;              | 0.0007 | 0.0000 | 0.0004 | 0.0002 | 0.0000 | 0.0001 | 0.2084 | 0.6736 |
| k__Bacteria;p__Verrucomicrobia;c__Verrucomicrobiae;o__Verrucomicrobiales;f__Verrucomicrobiaceae;g__Akkermans<br>ia;    | 0.0008 | 0.0000 | 0.0004 | 0.0003 | 0.0000 | 0.0002 | 0.3020 | 0.7562 |



|                                                                                                                     |        |        |        |        |        |        |        |        |
|---------------------------------------------------------------------------------------------------------------------|--------|--------|--------|--------|--------|--------|--------|--------|
| k__Bacteria;p__Proteobacteria;c__Gammaproteobacteria;o__Xanthomonadales;f__Xanthomonadaceae;g__Lysobacter;          | 0.0008 | 0.0000 | 0.0002 | 0.0001 | 0.0000 | 0.0000 | 0.0183 | 0.5935 |
| k__Bacteria;p__Firmicutes;c__Clostridia;o__Clostridiales;f__Lachnospiraceae;g__Roseburia;                           | 0.0003 | 0.0000 | 0.0002 | 0.0005 | 0.0000 | 0.0003 | 0.7010 | 1.0000 |
| k__Bacteria;p__Actinobacteria;c__Actinobacteria;o__Actinomycetales;f__Bogoriellaceae;g__Georgenia;                  | 0.0006 | 0.0000 | 0.0003 | 0.0001 | 0.0000 | 0.0000 | 0.0916 | 0.6675 |
| k__Bacteria;p__Proteobacteria;c__Gammaproteobacteria;o__Alteromonadales;f__Shewanellaceae;g__Shewanella;            | 0.0005 | 0.0000 | 0.0003 | 0.0004 | 0.0000 | 0.0003 | 0.8782 | 1.0000 |
| k__Bacteria;p__Firmicutes;c__Bacilli;o__Lactobacillales;f__Enterococcaceae;g__Enterococcus;                         | 0.0004 | 0.0000 | 0.0003 | 0.0001 | 0.0000 | 0.0000 | 0.4659 | 0.8256 |
| k__Bacteria;p__Proteobacteria;c__Epsilonproteobacteria;o__Campylobacteriales;f__Helicobacteraceae;g__Flexispira;    | 0.0005 | 0.0000 | 0.0003 | 0.0002 | 0.0000 | 0.0001 | 0.3332 | 0.7571 |
| k__Bacteria;p__Planctomycetes;c__Planctomycetia;o__Pirellulales;f__Pirellulaceae;g__Pirellula;                      | 0.0005 | 0.0000 | 0.0003 | 0.0000 | 0.0000 | 0.0000 | 0.1067 | 0.6675 |
| k__Bacteria;p__Proteobacteria;c__Betaproteobacteria;o__Burkholderiales;f__Oxalobacteraceae;g__Janthinobacterium;    | 0.0004 | 0.0000 | 0.0001 | 0.0006 | 0.0000 | 0.0003 | 0.6046 | 0.9403 |
| k__Bacteria;p__Actinobacteria;c__Actinobacteria;o__Actinomycetales;f__Brevibacteriaceae;g__Brevibacterium;          | 0.0004 | 0.0000 | 0.0003 | 0.0000 | 0.0000 | 0.0000 | 0.2352 | 0.7011 |
| k__Bacteria;p__Proteobacteria;c__Alphaproteobacteria;o__Sphingomonadales;f__Sphingomonadaceae;g__Sphingopyxis       | 0.0004 | 0.0000 | 0.0002 | 0.0001 | 0.0000 | 0.0000 | 0.1353 | 0.6675 |
| ;                                                                                                                   |        |        |        |        |        |        |        |        |
| k__Bacteria;p__Bacteroidetes;c__Bacteroidia;o__Bacteroidales;f__Rikenellaceae;g__AF12;                              | 0.0004 | 0.0000 | 0.0002 | 0.0003 | 0.0000 | 0.0001 | 0.6473 | 0.9615 |
| k__Bacteria;p__Firmicutes;c__Bacilli;o__Bacillales;f__Staphylococcaceae;g__Staphylococcus;                          | 0.0002 | 0.0000 | 0.0001 | 0.0006 | 0.0000 | 0.0002 | 0.1153 | 0.6675 |
| k__Bacteria;p__Proteobacteria;c__Alphaproteobacteria;o__Rhodobacterales;f__Rhodobacteraceae;g__Rubellimicrobium     | 0.0006 | 0.0000 | 0.0002 | 0.0005 | 0.0000 | 0.0001 | 0.8850 | 1.0000 |
| ;                                                                                                                   |        |        |        |        |        |        |        |        |
| k__Bacteria;p__Proteobacteria;c__Alphaproteobacteria;o__Caulobacteriales;f__Caulobacteraceae;g__Asticcacaulis;      | 0.0001 | 0.0000 | 0.0001 | 0.0003 | 0.0000 | 0.0003 | 0.7556 | 1.0000 |
| k__Bacteria;p__Proteobacteria;c__Alphaproteobacteria;o__Rhizobiales;f__Bradyrhizobiaceae;g__Afipia;                 | 0.0005 | 0.0000 | 0.0002 | 0.0002 | 0.0000 | 0.0001 | 0.2064 | 0.6736 |
| k__Bacteria;p__Deferribacteres;c__Deferribacteres;o__Deferribacterales;f__Deferribacteraceae;g__Mucispirillum;      | 0.0005 | 0.0000 | 0.0002 | 0.0002 | 0.0000 | 0.0001 | 0.4502 | 0.8256 |
| k__Bacteria;p__Proteobacteria;c__Gammaproteobacteria;o__Legionellales;f__Coxiellaceae;g__Aquicella;                 | 0.0004 | 0.0000 | 0.0001 | 0.0003 | 0.0000 | 0.0002 | 0.6467 | 0.9615 |
| k__Bacteria;p__Bacteroidetes;c__Sphingobacteriia;o__Sphingobacteriales;f__Sphingobacteriaceae;g__Sphingobacterium   | 0.0002 | 0.0000 | 0.0002 | 0.0000 | 0.0000 | 0.0000 | 0.3826 | 0.7953 |
| ;                                                                                                                   |        |        |        |        |        |        |        |        |
| k__Bacteria;p__Proteobacteria;c__Gammaproteobacteria;o__Xanthomonadales;f__Xanthomonadaceae;g__Thermomona           | 0.0004 | 0.0000 | 0.0002 | 0.0000 | 0.0000 | 0.0000 | 0.1035 | 0.6675 |
| s;                                                                                                                  |        |        |        |        |        |        |        |        |
| k__Bacteria;p__Proteobacteria;c__Deltaproteobacteria;o__Desulfovibrionales;f__Desulfovibrionaceae;g__Desulfovibrio; | 0.0003 | 0.0000 | 0.0002 | 0.0001 | 0.0000 | 0.0001 | 0.4956 | 0.8256 |
| k__Bacteria;p__Proteobacteria;c__Alphaproteobacteria;o__Rhizobiales;f__Hyphomicrobiaceae;g__Hyphomicrobium;         | 0.0003 | 0.0000 | 0.0001 | 0.0002 | 0.0000 | 0.0002 | 0.7898 | 1.0000 |
| k__Bacteria;p__Actinobacteria;c__Actinobacteria;o__Actinomycetales;f__Pseudonocardiaceae;g__Pseudonocardia;         | 0.0003 | 0.0000 | 0.0002 | 0.0001 | 0.0000 | 0.0000 | 0.2266 | 0.6864 |
| k__Bacteria;p__Actinobacteria;c__Actinobacteria;o__Actinomycetales;f__Pseudonocardiaceae;g__Saccharomonospora;      | 0.0002 | 0.0000 | 0.0001 | 0.0002 | 0.0000 | 0.0002 | 0.8411 | 1.0000 |
| k__Bacteria;p__Actinobacteria;c__Actinobacteria;o__Actinomycetales;f__Dermabacteraceae;g__Brachybacterium;          | 0.0002 | 0.0000 | 0.0002 | 0.0000 | 0.0000 | 0.0000 | 0.3032 | 0.7562 |
| k__Archaea;p__Crenarchaeota;c__Thaumarchaeota;o__Nitrososphaerales;f__Nitrososphaeraceae;g__Candidatus              | 0.0003 | 0.0000 | 0.0001 | 0.0001 | 0.0000 | 0.0001 | 0.2834 | 0.7418 |
| Nitrososphaera;                                                                                                     |        |        |        |        |        |        |        |        |
| k__Bacteria;p__Firmicutes;c__Bacilli;o__Bacillales;f__Paenibacillaceae;g__Cohnella;                                 | 0.0002 | 0.0000 | 0.0002 | 0.0000 | 0.0000 | 0.0000 | 0.2877 | 0.7438 |
| k__Bacteria;p__Firmicutes;c__Clostridia;o__Clostridiales;f__Dehalobacteriaceae;g__Dehalobacterium;                  | 0.0002 | 0.0000 | 0.0002 | 0.0001 | 0.0000 | 0.0001 | 0.8227 | 1.0000 |
| k__Bacteria;p__Actinobacteria;c__Actinobacteria;o__Actinomycetales;f__Microbacteriaceae;g__Leucobacter;             | 0.0003 | 0.0000 | 0.0001 | 0.0001 | 0.0000 | 0.0001 | 0.0967 | 0.6675 |
| k__Bacteria;p__Firmicutes;c__Bacilli;o__Bacillales;f__Paenibacillaceae;g__Brevibacillus;                            | 0.0002 | 0.0000 | 0.0001 | 0.0002 | 0.0000 | 0.0001 | 0.8179 | 1.0000 |
| k__Bacteria;p__Proteobacteria;c__Alphaproteobacteria;o__Rhodobacterales;f__Rhodobacteraceae;g__Marivita;            | 0.0001 | 0.0000 | 0.0000 | 0.0002 | 0.0000 | 0.0002 | 0.7035 | 1.0000 |
| k__Bacteria;p__Bacteroidetes;c__[Saprosirae];o__[Saprosirales];f__Chitinophagaceae;g__Flavisolibacter;              | 0.0002 | 0.0000 | 0.0001 | 0.0000 | 0.0000 | 0.0000 | 0.2235 | 0.6864 |

|                                                                                                                   |        |        |        |        |        |        |        |        |
|-------------------------------------------------------------------------------------------------------------------|--------|--------|--------|--------|--------|--------|--------|--------|
| k__Bacteria;p__Actinobacteria;c__Actinobacteria;o__Actinomycetales;f__Tsukamurellaceae;g__Tsukamurella;           | 0.0002 | 0.0000 | 0.0001 | 0.0000 | 0.0000 | 0.0000 | 0.1951 | 0.6736 |
| k__Bacteria;p__Proteobacteria;c__Gammaproteobacteria;o__Xanthomonadales;f__Xanthomonadaceae;g__Stenotrophomonas;  | 0.0002 | 0.0000 | 0.0001 | 0.0000 | 0.0000 | 0.0000 | 0.0462 | 0.6675 |
| k__Bacteria;p__Actinobacteria;c__Actinobacteria;o__Actinomycetales;f__Thermomonosporaceae;g__Actinomadura;        | 0.0001 | 0.0000 | 0.0000 | 0.0001 | 0.0000 | 0.0001 | 0.9345 | 1.0000 |
| k__Bacteria;p__Bacteroidetes;c__[Saprosirae];o__[Saprosirales];f__Chitinophagaceae;g__Chitinophaga;               | 0.0001 | 0.0000 | 0.0001 | 0.0000 | 0.0000 | 0.0000 | 0.3826 | 0.7953 |
| k__Bacteria;p__Proteobacteria;c__Alphaproteobacteria;o__Rhodobacterales;f__Rhodobacteraceae;g__Rhodobacter;       | 0.0002 | 0.0000 | 0.0001 | 0.0000 | 0.0000 | 0.0000 | 0.1272 | 0.6675 |
| k__Bacteria;p__Proteobacteria;c__Alphaproteobacteria;o__Rhodobacterales;f__Rhodobacteraceae;g__Amaricoccus;       | 0.0002 | 0.0000 | 0.0001 | 0.0000 | 0.0000 | 0.0000 | 0.0631 | 0.6675 |
| k__Bacteria;p__Proteobacteria;c__Alphaproteobacteria;o__Rhizobiales;f__Beijerinckiaceae;g__Beijerinckia;          | 0.0002 | 0.0000 | 0.0000 | 0.0001 | 0.0000 | 0.0001 | 0.2717 | 0.7290 |
| k__Bacteria;p__Actinobacteria;c__Actinobacteria;o__Bifidobacteriales;f__Bifidobacteriaceae;g__Bifidobacterium;    | 0.0002 | 0.0000 | 0.0001 | 0.0000 | 0.0000 | 0.0000 | 0.1322 | 0.6675 |
| k__Bacteria;p__Proteobacteria;c__Betaproteobacteria;o__Neisseriales;f__Neisseriaceae;g__Chitinilyticum;           | 0.0001 | 0.0000 | 0.0001 | 0.0000 | 0.0000 | 0.0000 | 0.1858 | 0.6736 |
| k__Bacteria;p__Proteobacteria;c__Gammaproteobacteria;o__Vibrionales;f__Vibrionaceae;g__Vibrio;                    | 0.0001 | 0.0000 | 0.0001 | 0.0001 | 0.0000 | 0.0001 | 0.9112 | 1.0000 |
| k__Bacteria;p__Firmicutes;c__Bacilli;o__Lactobacillales;f__Streptococcaceae;g__Streptococcus;                     | 0.0001 | 0.0000 | 0.0001 | 0.0001 | 0.0000 | 0.0001 | 0.7810 | 1.0000 |
| k__Bacteria;p__Actinobacteria;c__Actinobacteria;o__Actinomycetales;f__Micrococcaceae;g__Arthrobacter;             | 0.0001 | 0.0000 | 0.0001 | 0.0000 | 0.0000 | 0.0000 | 0.1983 | 0.6736 |
| k__Bacteria;p__Planctomycetes;c__Planctomycetia;o__Pirellulales;f__Pirellulaceae;g__A17;                          | 0.0001 | 0.0000 | 0.0001 | 0.0000 | 0.0000 | 0.0000 | 0.2493 | 0.7011 |
| k__Bacteria;p__Bacteroidetes;c__Bacteroidia;o__Bacteroidales;f__Porphyromonadaceae;g__Candidatus Azobacteroides;  | 0.0000 | 0.0000 | 0.0000 | 0.0001 | 0.0000 | 0.0001 | 0.3826 | 0.7953 |
| k__Bacteria;p__Verrucomicrobia;c__Opitutae;o__Opitutales;f__Opitutaceae;g__Opitutus;                              | 0.0001 | 0.0000 | 0.0001 | 0.0000 | 0.0000 | 0.0000 | 0.0811 | 0.6675 |
| k__Bacteria;p__Proteobacteria;c__Alphaproteobacteria;o__Sphingomonadales;f__Sphingomonadaceae;g__Novosphingobium; | 0.0001 | 0.0000 | 0.0000 | 0.0000 | 0.0000 | 0.0000 | 0.0657 | 0.6675 |
| k__Bacteria;p__Verrucomicrobia;c__[Spartobacteria];o__[Chthoniobacterales];f__[Chthoniobacteraceae];g__DA101;     | 0.0001 | 0.0000 | 0.0001 | 0.0000 | 0.0000 | 0.0000 | 0.0338 | 0.6615 |
| k__Bacteria;p__Proteobacteria;c__Alphaproteobacteria;o__Caulobacterales;f__Caulobacteraceae;g__Mycoplasma;        | 0.0001 | 0.0000 | 0.0001 | 0.0000 | 0.0000 | 0.0000 | 0.4746 | 0.8256 |
| k__Bacteria;p__Proteobacteria;c__Betaproteobacteria;o__Neisseriales;f__Neisseriaceae;g__Vogesella;                | 0.0000 | 0.0000 | 0.0000 | 0.0001 | 0.0000 | 0.0001 | 0.3826 | 0.7953 |
| k__Bacteria;p__Proteobacteria;c__Gammaproteobacteria;o__Xanthomonadales;f__Xanthomonadaceae;g__Rhodanobacter;     | 0.0001 | 0.0000 | 0.0000 | 0.0000 | 0.0000 | 0.0000 | 0.5117 | 0.8345 |
| k__Bacteria;p__Actinobacteria;c__Actinobacteria;o__Actinomycetales;f__Microbacteriaceae;g__Microbacterium;        | 0.0001 | 0.0000 | 0.0000 | 0.0000 | 0.0000 | 0.0000 | 0.2933 | 0.7492 |
| k__Bacteria;p__Proteobacteria;c__Alphaproteobacteria;o__Rhodospirillales;f__Rhodospirillaceae;g__Inquilinus;      | 0.0001 | 0.0000 | 0.0000 | 0.0000 | 0.0000 | 0.0000 | 0.0276 | 0.6615 |
| k__Bacteria;p__Firmicutes;c__Clostridia;o__Clostridiales;f__Lachnospiraceae;g__Dorea;                             | 0.0001 | 0.0000 | 0.0000 | 0.0000 | 0.0000 | 0.0000 | 0.3313 | 0.7571 |
| k__Bacteria;p__Proteobacteria;c__Gammaproteobacteria;o__Alteromonadales;f__Alteromonadaceae;g__Cellvibrio;        | 0.0000 | 0.0000 | 0.0000 | 0.0001 | 0.0000 | 0.0001 | 0.2091 | 0.6736 |
| k__Bacteria;p__Firmicutes;c__Clostridia;o__Clostridiales;f__[Tissierellaceae];g__Sedimentibacter;                 | 0.0001 | 0.0000 | 0.0001 | 0.0000 | 0.0000 | 0.0000 | 0.2383 | 0.7011 |
| k__Bacteria;p__Firmicutes;c__Erysipelotrichi;o__Erysipelotrichales;f__Erysipelotrichaceae;g__Clostridium;         | 0.0001 | 0.0000 | 0.0000 | 0.0000 | 0.0000 | 0.0000 | 0.1470 | 0.6675 |
| k__Bacteria;p__Firmicutes;c__Clostridia;o__Clostridiales;f__Lachnospiraceae;g__Anaerostipes;                      | 0.0001 | 0.0000 | 0.0001 | 0.0000 | 0.0000 | 0.0000 | 0.8039 | 1.0000 |
| k__Bacteria;p__Actinobacteria;c__Actinobacteria;o__Actinomycetales;f__Microbacteriaceae;g__Salinibacterium;       | 0.0001 | 0.0000 | 0.0000 | 0.0000 | 0.0000 | 0.0000 | 0.1913 | 0.6736 |
| k__Bacteria;p__Acidobacteria;c__Solibacteres;o__Solibacterales;f__Solibacteraceae;g__Candidatus Solibacter;       | 0.0001 | 0.0000 | 0.0001 | 0.0000 | 0.0000 | 0.0000 | 0.3099 | 0.7571 |
| k__Bacteria;p__Proteobacteria;c__Betaproteobacteria;o__Burkholderiales;f__Burkholderiaceae;g__Burkholderia;       | 0.0001 | 0.0000 | 0.0000 | 0.0000 | 0.0000 | 0.0000 | 0.1913 | 0.6736 |
| k__Bacteria;p__Proteobacteria;c__Alphaproteobacteria;o__Rhizobiales;f__Methylobacteriaceae;g__Methylobacterium;   | 0.0000 | 0.0000 | 0.0000 | 0.0000 | 0.0000 | 0.0000 | 0.9026 | 1.0000 |

|                                                                                                                    |        |        |        |        |        |        |        |        |
|--------------------------------------------------------------------------------------------------------------------|--------|--------|--------|--------|--------|--------|--------|--------|
| k__Bacteria;p__Firmicutes;c__Bacilli;o__Bacillales;f__Thermoactinomyetaceae;g__Laceyella;                          | 0.0001 | 0.0000 | 0.0000 | 0.0001 | 0.0000 | 0.0000 | 0.9794 | 1.0000 |
| k__Bacteria;p__Proteobacteria;c__Betaproteobacteria;o__Rhodocyclales;f__Rhodocyclaceae;g__Azoarcus;                | 0.0001 | 0.0000 | 0.0000 | 0.0000 | 0.0000 | 0.0000 | 0.1759 | 0.6736 |
| k__Bacteria;p__Proteobacteria;c__Deltaproteobacteria;o__Bdellovibrionales;f__Bdellovibrionaceae;g__Bdellovibrio;   | 0.0000 | 0.0000 | 0.0000 | 0.0000 | 0.0000 | 0.0000 | 0.4232 | 0.8256 |
| k__Bacteria;p__Firmicutes;c__Clostridia;o__Clostridiales;f__Peptococcaceae;g__Desulfosporosinus;                   | 0.0000 | 0.0000 | 0.0000 | 0.0001 | 0.0000 | 0.0000 | 0.5876 | 0.9227 |
| k__Bacteria;p__Proteobacteria;c__Gammaproteobacteria;o__Xanthomonadales;f__Xanthomonadaceae;g__Dokdonella;         | 0.0001 | 0.0000 | 0.0000 | 0.0000 | 0.0000 | 0.0000 | 0.0312 | 0.6615 |
| k__Bacteria;p__Proteobacteria;c__Deltaproteobacteria;o__Desulfovibrionales;f__Desulfovibrionaceae;g__Bilophila;    | 0.0000 | 0.0000 | 0.0000 | 0.0000 | 0.0000 | 0.0000 | 0.7593 | 1.0000 |
| k__Bacteria;p__Proteobacteria;c__Deltaproteobacteria;o__Myxococcales;f__Myxococcaceae;g__Myxococcus;               | 0.0001 | 0.0000 | 0.0000 | 0.0000 | 0.0000 | 0.0000 | 0.2129 | 0.6736 |
| k__Bacteria;p__Tenericutes;c__Mollicutes;o__Anaeroplasmatales;f__Anaeroplasmataceae;g__Anaeroplasmata;             | 0.0000 | 0.0000 | 0.0000 | 0.0000 | 0.0000 | 0.0000 | 0.4232 | 0.8256 |
| k__Bacteria;p__Synergistetes;c__Synergistia;o__Synergistales;f__Dethiosulfovibrionaceae;g__Aminobacterium;         | 0.0000 | 0.0000 | 0.0000 | 0.0001 | 0.0000 | 0.0000 | 0.3215 | 0.7571 |
| k__Bacteria;p__Proteobacteria;c__Alphaproteobacteria;o__Rhizobiales;f__Phyllobacteriaceae;g__Mesorhizobium;        | 0.0001 | 0.0000 | 0.0000 | 0.0000 | 0.0000 | 0.0000 | 0.2129 | 0.6736 |
| k__Bacteria;p__Actinobacteria;c__Actinobacteria;o__Actinomycetales;f__Dietziaceae;g__Dietzia;                      | 0.0000 | 0.0000 | 0.0000 | 0.0000 | 0.0000 | 0.0000 | 0.4232 | 0.8256 |
| k__Bacteria;p__Proteobacteria;c__Gammaproteobacteria;o__Alteromonadales;f__HTCC2188;g__HTCC;                       | 0.0001 | 0.0000 | 0.0000 | 0.0000 | 0.0000 | 0.0000 | 0.2129 | 0.6736 |
| k__Bacteria;p__Proteobacteria;c__Betaproteobacteria;o__Methylophilales;f__Methylophilaceae;g__Methylotenera;       | 0.0001 | 0.0000 | 0.0000 | 0.0000 | 0.0000 | 0.0000 | 0.0811 | 0.6675 |
| k__Bacteria;p__Proteobacteria;c__Betaproteobacteria;o__Burkholderiales;f__Comamonadaceae;g__Rubrivivax;            | 0.0000 | 0.0000 | 0.0000 | 0.0000 | 0.0000 | 0.0000 | 0.6077 | 0.9403 |
| k__Bacteria;p__Proteobacteria;c__Alphaproteobacteria;o__Rhizobiales;f__Rhizobiaceae;g__Kaistia;                    | 0.0000 | 0.0000 | 0.0000 | 0.0000 | 0.0000 | 0.0000 | 0.3357 | 0.7571 |
| k__Bacteria;p__Nitrospirae;c__Nitrospira;o__Nitrospirales;f__Nitrospiraceae;g__Nitrospira;                         | 0.0000 | 0.0000 | 0.0000 | 0.0000 | 0.0000 | 0.0000 | 0.1574 | 0.6675 |
| k__Bacteria;p__Firmicutes;c__Clostridia;o__Clostridiales;f__Ruminococcaceae;g__Butyricoccus;                       | 0.0000 | 0.0000 | 0.0000 | 0.0000 | 0.0000 | 0.0000 | 0.6486 | 0.9615 |
| k__Bacteria;p__Verrucomicrobia;c__Verrucomicrobiae;o__Verrucomicrobiales;f__Verrucomicrobiaceae;g__Luteolibacter;  | 0.0001 | 0.0000 | 0.0000 | 0.0000 | 0.0000 | 0.0000 | 0.0374 | 0.6615 |
| k__Bacteria;p__Proteobacteria;c__Alphaproteobacteria;o__Rhodospirillales;f__Rhodospirillaceae;g__Constrictibacter; | 0.0001 | 0.0000 | 0.0000 | 0.0000 | 0.0000 | 0.0000 | 0.0811 | 0.6675 |
| k__Bacteria;p__Chlamydiae;c__Chlamydiae;o__Chlamydiales;f__Rhabdochlamydiaceae;g__Candidatus Rhabdochlamydia;      | 0.0000 | 0.0000 | 0.0000 | 0.0000 | 0.0000 | 0.0000 | 0.3826 | 0.7953 |
| k__Bacteria;p__Firmicutes;c__Bacilli;o__Lactobacillales;f__Streptococcaceae;g__Lactococcus;                        | 0.0000 | 0.0000 | 0.0000 | 0.0000 | 0.0000 | 0.0000 | 0.1574 | 0.6675 |
| k__Bacteria;p__Actinobacteria;c__Coriobacteriia;o__Coriobacteriales;f__Coriobacteriaceae;g__Adlercreutzia;         | 0.0000 | 0.0000 | 0.0000 | 0.0000 | 0.0000 | 0.0000 | 0.1574 | 0.6675 |
| k__Bacteria;p__Actinobacteria;c__Actinobacteria;o__Actinomycetales;f__Propionibacteriaceae;g__Propionibacterium;   | 0.0000 | 0.0000 | 0.0000 | 0.0000 | 0.0000 | 0.0000 | 0.8330 | 1.0000 |
| k__Bacteria;p__Firmicutes;c__Clostridia;o__Clostridiales;f__Peptostreptococcaceae;g__Tepidibacter;                 | 0.0000 | 0.0000 | 0.0000 | 0.0000 | 0.0000 | 0.0000 | 0.6486 | 0.9615 |
| k__Bacteria;p__Proteobacteria;c__Alphaproteobacteria;o__Rhodospirillales;f__Rhodospirillaceae;g__Elstera;          | 0.0000 | 0.0000 | 0.0000 | 0.0000 | 0.0000 | 0.0000 | 0.6486 | 0.9615 |
| k__Bacteria;p__Firmicutes;c__Bacilli;o__Bacillales;f__Paenibacillaceae;g__Aneurinibacillus;                        | 0.0000 | 0.0000 | 0.0000 | 0.0001 | 0.0000 | 0.0000 | 0.3357 | 0.7571 |
| k__Bacteria;p__Lentisphaerae;c__[Lentisphaeria];o__Victivallales;f__Victivallaceae;g__Victivallis;                 | 0.0000 | 0.0000 | 0.0000 | 0.0000 | 0.0000 | 0.0000 | 0.1574 | 0.6675 |
| k__Bacteria;p__Firmicutes;c__Clostridia;o__Clostridiales;f__Clostridiaceae;g__Caloramator;                         | 0.0001 | 0.0000 | 0.0000 | 0.0000 | 0.0000 | 0.0000 | 0.0152 | 0.5935 |
| k__Bacteria;p__Proteobacteria;c__Alphaproteobacteria;o__Rhizobiales;f__Methylocystaceae;g__Methylophila;           | 0.0001 | 0.0000 | 0.0000 | 0.0000 | 0.0000 | 0.0000 | 0.5024 | 0.8256 |
| k__Bacteria;p__Actinobacteria;c__Actinobacteria;o__Actinomycetales;f__Nocardiodaceae;g__Aeromicrobium;             | 0.0001 | 0.0000 | 0.0000 | 0.0000 | 0.0000 | 0.0000 | 0.0374 | 0.6615 |
| k__Bacteria;p__Firmicutes;c__Bacilli;o__Lactobacillales;f__Aerococcaceae;g__Aerococcus;                            | 0.0000 | 0.0000 | 0.0000 | 0.0000 | 0.0000 | 0.0000 | 0.3826 | 0.7953 |

|                                                                                                                                      |        |        |        |        |        |        |        |        |
|--------------------------------------------------------------------------------------------------------------------------------------|--------|--------|--------|--------|--------|--------|--------|--------|
| k__Bacteria;p__Actinobacteria;c__Actinobacteria;o__Actinomycetales;f__Microbacteriaceae;g__Pseudoclavibacter;                        | 0.0000 | 0.0000 | 0.0000 | 0.0000 | 0.0000 | 0.0000 | 1.0000 | 1.0000 |
| k__Bacteria;p__Firmicutes;c__Clostridia;o__Clostridiales;f__[Tissierellaceae];g__Finegoldia;                                         | 0.0000 | 0.0000 | 0.0000 | 0.0000 | 0.0000 | 0.0000 | 0.5000 | 0.8256 |
| k__Bacteria;p__Actinobacteria;c__Actinobacteria;o__Actinomycetales;f__Streptosporangiaceae;g__Nonomuraea;                            | 0.0000 | 0.0000 | 0.0000 | 0.0000 | 0.0000 | 0.0000 | 0.5000 | 0.8256 |
| k__Bacteria;p__Bacteroidetes;c__Flavobacteriia;o__Flavobacteriales;f__[Weeksellaceae];g__Cloacibacterium;                            | 0.0000 | 0.0000 | 0.0000 | 0.0000 | 0.0000 | 0.0000 | 0.0676 | 0.6675 |
| k__Bacteria;p__Fusobacteria;c__Fusobacteriia;o__Fusobacteriales;f__Fusobacteriaceae;g__Fusobacterium;                                | 0.0000 | 0.0000 | 0.0000 | 0.0000 | 0.0000 | 0.0000 | 0.5000 | 0.8256 |
| k__Bacteria;p__Actinobacteria;c__Thermoleophilii;o__Solirubrobacterales;f__Patulibacteraceae;g__Patulibacter;                        | 0.0000 | 0.0000 | 0.0000 | 0.0000 | 0.0000 | 0.0000 | 0.5000 | 0.8256 |
| k__Bacteria;p__Proteobacteria;c__Gammaproteobacteria;o__Xanthomonadales;f__Xanthomonadaceae;g__Pseudoxanthomonas;                    | 0.0000 | 0.0000 | 0.0000 | 0.0000 | 0.0000 | 0.0000 | 0.3826 | 0.7953 |
| k__Bacteria;p__Firmicutes;c__Clostridia;o__Clostridiales;f__Clostridiaceae;g__Candidatus Arthromitus;                                | 0.0000 | 0.0000 | 0.0000 | 0.0000 | 0.0000 | 0.0000 | 0.0676 | 0.6675 |
| k__Bacteria;p__Firmicutes;c__Erysipelotrichi;o__Erysipelotrichales;f__Erysipelotrichaceae;g__Coprobacillus;                          | 0.0000 | 0.0000 | 0.0000 | 0.0000 | 0.0000 | 0.0000 | 0.5000 | 0.8256 |
| k__Bacteria;p__Proteobacteria;c__Alphaproteobacteria;o__Rhizobiales;f__Rhizobiaceae;g__Prosthecomicrobium;                           | 0.0000 | 0.0000 | 0.0000 | 0.0000 | 0.0000 | 0.0000 | 0.1166 | 0.6675 |
| k__Bacteria;p__Actinobacteria;c__Actinobacteria;o__Actinomycetales;f__Microbacteriaceae;g__Agromyces;                                | 0.0000 | 0.0000 | 0.0000 | 0.0000 | 0.0000 | 0.0000 | 1.0000 | 1.0000 |
| k__Bacteria;p__Bacteroidetes;c__Cytophagia;o__Cytophagales;f__Cytophagaceae;g__Flectobacillus;                                       | 0.0000 | 0.0000 | 0.0000 | 0.0000 | 0.0000 | 0.0000 | 0.1166 | 0.6675 |
| k__Bacteria;p__Proteobacteria;c__Gammaproteobacteria;o__Pasteurellales;f__Pasteurellaceae;g__Aggregatibacter;                        | 0.0000 | 0.0000 | 0.0000 | 0.0000 | 0.0000 | 0.0000 | 0.5000 | 0.8256 |
| k__Bacteria;p__Proteobacteria;c__Gammaproteobacteria;o__Vibrionales;f__Pseudoalteromonadaceae;g__Pseudoalteromonas;                  | 0.0000 | 0.0000 | 0.0000 | 0.0000 | 0.0000 | 0.0000 | 0.8002 | 1.0000 |
| k__Bacteria;p__Bacteroidetes;c__[Saprospirae];o__[Saprospirales];f__Chitinophagaceae;g__Parasegitibacter;                            | 0.0000 | 0.0000 | 0.0000 | 0.0000 | 0.0000 | 0.0000 | 0.1166 | 0.6675 |
| k__Bacteria;p__Firmicutes;c__Bacilli;o__Bacillales;f__Bacillaceae;g__Terribacillus;                                                  | 0.0000 | 0.0000 | 0.0000 | 0.0000 | 0.0000 | 0.0000 | 1.0000 | 1.0000 |
| k__Bacteria;p__Actinobacteria;c__Actinobacteria;o__Actinomycetales;f__Actinomycetaceae;g__Actinomyces;                               | 0.0000 | 0.0000 | 0.0000 | 0.0000 | 0.0000 | 0.0000 | 1.0000 | 1.0000 |
| k__Bacteria;p__Verrucomicrobia;c__[Spartobacteria];o__[Chthoniobacterales];f__[Chthoniobacteraceae];g__Candidatus Xiphinematobacter; | 0.0000 | 0.0000 | 0.0000 | 0.0000 | 0.0000 | 0.0000 | 1.0000 | 1.0000 |
| k__Bacteria;p__Firmicutes;c__Clostridia;o__Clostridiales;f__Veillonellaceae;g__Megasphaera;                                          | 0.0000 | 0.0000 | 0.0000 | 0.0000 | 0.0000 | 0.0000 | 1.0000 | 1.0000 |
| k__Bacteria;p__Proteobacteria;c__Alphaproteobacteria;o__Rhizobiales;f__Rhodobiaceae;g__Afifella;                                     | 0.0000 | 0.0000 | 0.0000 | 0.0000 | 0.0000 | 0.0000 | 1.0000 | 1.0000 |
| k__Bacteria;p__Proteobacteria;c__Gammaproteobacteria;o__Xanthomonadales;f__Xanthomonadaceae;g__Ignatzschineria;                      | 0.0000 | 0.0000 | 0.0000 | 0.0000 | 0.0000 | 0.0000 | 1.0000 | 1.0000 |
| k__Bacteria;p__Actinobacteria;c__Actinobacteria;o__Actinomycetales;f__Micrococcaceae;g__Micrococcus;                                 | 0.0000 | 0.0000 | 0.0000 | 0.0000 | 0.0000 | 0.0000 | 1.0000 | 1.0000 |
| k__Bacteria;p__Proteobacteria;c__Gammaproteobacteria;o__Alteromonadales;f__Alteromonadaceae;g__Alteromonas;                          | 0.0000 | 0.0000 | 0.0000 | 0.0000 | 0.0000 | 0.0000 | 0.5000 | 0.8256 |
| k__Bacteria;p__Firmicutes;c__Clostridia;o__Clostridiales;f__Veillonellaceae;g__Veillonella;                                          | 0.0000 | 0.0000 | 0.0000 | 0.0000 | 0.0000 | 0.0000 | 1.0000 | 1.0000 |
| k__Bacteria;p__Actinobacteria;c__Actinobacteria;o__Actinomycetales;f__Gordoniaceae;g__Gordonia;                                      | 0.0000 | 0.0000 | 0.0000 | 0.0000 | 0.0000 | 0.0000 | 1.0000 | 1.0000 |
| k__Bacteria;p__Proteobacteria;c__Deltaproteobacteria;o__Syntrophobacterales;f__Syntrophaceae;g__Desulfobacca;                        | 0.0000 | 0.0000 | 0.0000 | 0.0000 | 0.0000 | 0.0000 | 1.0000 | 1.0000 |
| k__Bacteria;p__Proteobacteria;c__Gammaproteobacteria;o__Legionellales;f__Legionellaceae;g__Legionella;                               | 0.0000 | 0.0000 | 0.0000 | 0.0000 | 0.0000 | 0.0000 | 1.0000 | 1.0000 |
| k__Bacteria;p__Nitrospirae;c__Nitrospira;o__Nitrospirales;f__[Thermodesulfovibrionaceae];g__HB118;                                   | 0.0000 | 0.0000 | 0.0000 | 0.0000 | 0.0000 | 0.0000 | 1.0000 | 1.0000 |
| k__Bacteria;p__Firmicutes;c__Clostridia;o__Clostridiales;f__Clostridiaceae;g__Clostridiolibacter;                                    | 0.0000 | 0.0000 | 0.0000 | 0.0000 | 0.0000 | 0.0000 | 0.5000 | 0.8256 |
| k__Bacteria;p__Firmicutes;c__Clostridia;o__Clostridiales;f__Clostridiaceae;g__SMB53;                                                 | 0.0000 | 0.0000 | 0.0000 | 0.0000 | 0.0000 | 0.0000 | 0.5000 | 0.8256 |
| k__Bacteria;p__Actinobacteria;c__Actinobacteria;o__Actinomycetales;f__Cellulomonadaceae;g__Cellulomonas;                             | 0.0000 | 0.0000 | 0.0000 | 0.0000 | 0.0000 | 0.0000 | 0.5000 | 0.8256 |

|                                                                                                                   |        |        |        |        |        |        |        |        |
|-------------------------------------------------------------------------------------------------------------------|--------|--------|--------|--------|--------|--------|--------|--------|
| k__Bacteria;p__Firmicutes;c__Clostridia;o__Clostridiales;f__Peptococcaceae;g__Pelotomaculum;                      | 0.0000 | 0.0000 | 0.0000 | 0.0000 | 0.0000 | 0.0000 | 1.0000 | 1.0000 |
| k__Bacteria;p__Proteobacteria;c__Deltaproteobacteria;o__Myxococcales;f__Nannocystaceae;g__Plesiocystis;           | 0.0000 | 0.0000 | 0.0000 | 0.0000 | 0.0000 | 0.0000 | 0.5000 | 0.8256 |
| k__Bacteria;p__Actinobacteria;c__Actinobacteria;o__Actinomycetales;f__Glycomycetaceae;g__Glycomyces;              | 0.0000 | 0.0000 | 0.0000 | 0.0000 | 0.0000 | 0.0000 | 0.5000 | 0.8256 |
| k__Bacteria;p__Verrucomicrobia;c__[Spartobacteria];o__[Chthoniobacteriales];f__[Chthoniobacteraceae];g__Ellin506; | 0.0000 | 0.0000 | 0.0000 | 0.0000 | 0.0000 | 0.0000 | 1.0000 | 1.0000 |
| k__Bacteria;p__Bacteroidetes;c__Cytophagia;o__Cytophagales;f__Cytophagaceae;g__Pontibacter;                       | 0.0000 | 0.0000 | 0.0000 | 0.0000 | 0.0000 | 0.0000 | 1.0000 | 1.0000 |
| k__Bacteria;p__Chloroflexi;c__Anaerolineae;o__Anaerolineales;f__Anaerolineaceae;g__Anaerolinea;                   | 0.0000 | 0.0000 | 0.0000 | 0.0000 | 0.0000 | 0.0000 | 1.0000 | 1.0000 |
| k__Bacteria;p__Firmicutes;c__Bacilli;o__Bacillales;f__Alicyclobacillaceae;g__Alicyclobacillus;                    | 0.0000 | 0.0000 | 0.0000 | 0.0000 | 0.0000 | 0.0000 | 1.0000 | 1.0000 |
| k__Bacteria;p__Verrucomicrobia;c__Verrucomicrobiae;o__Verrucomicrobiales;f__Verrucomicrobiaceae;g__Rubritalea;    | 0.0000 | 0.0000 | 0.0000 | 0.0000 | 0.0000 | 0.0000 | 1.0000 | 1.0000 |
| k__Archaea;p__Euryarchaeota;c__Methanobacteria;o__Methanobacteriales;f__Methanobacteriaceae;g__Methanobacterium;  | 0.0000 | 0.0000 | 0.0000 | 0.0000 | 0.0000 | 0.0000 | 1.0000 | 1.0000 |
| k__Bacteria;p__Proteobacteria;c__Alphaproteobacteria;o__Rhodospirillales;f__Rhodospirillaceae;g__Skermanella;     | 0.0000 | 0.0000 | 0.0000 | 0.0000 | 0.0000 | 0.0000 | 1.0000 | 1.0000 |
| k__Bacteria;p__Actinobacteria;c__Actinobacteria;o__Actinomycetales;f__Nocardiodaceae;g__Nocardiooides;            | 0.0000 | 0.0000 | 0.0000 | 0.0000 | 0.0000 | 0.0000 | 0.5000 | 0.8256 |
| k__Bacteria;p__Actinobacteria;c__Actinobacteria;o__Actinomycetales;f__Thermomonosporaceae;g__Actinocorallia;      | 0.0000 | 0.0000 | 0.0000 | 0.0000 | 0.0000 | 0.0000 | 1.0000 | 1.0000 |
| k__Bacteria;p__Firmicutes;c__Clostridia;o__Clostridiales;f__Lachnospiraceae;g__Clostridium;                       | 0.0000 | 0.0000 | 0.0000 | 0.0000 | 0.0000 | 0.0000 | 0.5000 | 0.8256 |
| k__Bacteria;p__Firmicutes;c__Clostridia;o__Clostridiales;f__Gracilibacteraceae;g__Gracilibacter;                  | 0.0000 | 0.0000 | 0.0000 | 0.0000 | 0.0000 | 0.0000 | 1.0000 | 1.0000 |
| k__Bacteria;p__Acidobacteria;c__Acidobacteriia;o__Acidobacteriales;f__Koribacteraceae;g__Candidatus Koribacter;   | 0.0000 | 0.0000 | 0.0000 | 0.0000 | 0.0000 | 0.0000 | 1.0000 | 1.0000 |
| k__Bacteria;p__Bacteroidetes;c__Sphingobacteriia;o__Sphingobacteriales;f__Sphingobacteriaceae;g__Parapedobacter;  | 0.0000 | 0.0000 | 0.0000 | 0.0000 | 0.0000 | 0.0000 | 1.0000 | 1.0000 |
| k__Bacteria;p__Firmicutes;c__Clostridia;o__Clostridiales;f__Syntrophomonadaceae;g__Syntrophomonas;                | 0.0000 | 0.0000 | 0.0000 | 0.0000 | 0.0000 | 0.0000 | 0.0000 | 0.0000 |
| k__Bacteria;p__Verrucomicrobia;c__[Spartobacteria];o__[Chthoniobacteriales];f__[Chthoniobacteraceae];g__OR-59;    | 0.0000 | 0.0000 | 0.0000 | 0.0000 | 0.0000 | 0.0000 | 1.0000 | 1.0000 |
| k__Bacteria;p__Proteobacteria;c__Alphaproteobacteria;o__Rhodospirillales;f__Acetobacteraceae;g__Roseococcus;      | 0.0000 | 0.0000 | 0.0000 | 0.0000 | 0.0000 | 0.0000 | 1.0000 | 1.0000 |
| k__Bacteria;p__Proteobacteria;c__Gammaproteobacteria;o__Vibrionales;f__Vibrionaceae;g__Aliivibrio;                | 0.0000 | 0.0000 | 0.0000 | 0.0000 | 0.0000 | 0.0000 | 1.0000 | 1.0000 |
| k__Bacteria;p__Bacteroidetes;c__Flavobacteriia;o__Flavobacteriales;f__Flavobacteriaceae;g__Flavobacterium;        | 0.0000 | 0.0000 | 0.0000 | 0.0000 | 0.0000 | 0.0000 | 1.0000 | 1.0000 |
| k__Bacteria;p__Proteobacteria;c__Alphaproteobacteria;o__Rhizobiales;f__Xanthobacteraceae;g__Labrys;               | 0.0000 | 0.0000 | 0.0000 | 0.0000 | 0.0000 | 0.0000 | 1.0000 | 1.0000 |
| k__Bacteria;p__Chloroflexi;c__Dehalococcoidetes;o__Dehalococcoidales;f__Dehalococcoidaceae;g__Dehalogenimonas;    | 0.0000 | 0.0000 | 0.0000 | 0.0000 | 0.0000 | 0.0000 | 1.0000 | 1.0000 |
| k__Bacteria;p__Bacteroidetes;c__Sphingobacteriia;o__Sphingobacteriales;f__Sphingobacteriaceae;g__Solitalea;       | 0.0000 | 0.0000 | 0.0000 | 0.0000 | 0.0000 | 0.0000 | 1.0000 | 1.0000 |
| k__Bacteria;p__Bacteroidetes;c__[Saprospirae];o__[Saprospirales];f__Chitinophagaceae;g__Flaviumibacter;           | 0.0000 | 0.0000 | 0.0000 | 0.0000 | 0.0000 | 0.0000 | 1.0000 | 1.0000 |
| k__Bacteria;p__Planctomycetes;c__Planctomycetia;o__Gemmatales;f__Gemmataceae;g__Gemmata;                          | 0.0000 | 0.0000 | 0.0000 | 0.0000 | 0.0000 | 0.0000 | 1.0000 | 1.0000 |
| k__Bacteria;p__Firmicutes;c__Bacilli;o__Bacillales;f__Sporolactobacillaceae;g__Sporolactobacillus;                | 0.0000 | 0.0000 | 0.0000 | 0.0000 | 0.0000 | 0.0000 | 1.0000 | 1.0000 |
| Others                                                                                                            | 0.4032 | 0.0017 | 0.0236 | 0.3345 | 0.0170 | 0.0752 | 0.5005 | 0.8256 |

## Dataset 5 Statistical analysis of community composition in species level

| Taxa                                                                                                                             | mean(NS1) | variance | STDEV  | mean(OS1) | variance | STDEV  | p value | q value |
|----------------------------------------------------------------------------------------------------------------------------------|-----------|----------|--------|-----------|----------|--------|---------|---------|
| k__Bacteria;p__Firmicutes;c__Bacilli;o__Lactobacillales;f__Lactobacillaceae;g__Lactobacillus;s__acidipiscis;                     | 0.1228    | 0.0100   | 0.0578 | 0.2150    | 0.0447   | 0.1220 | 0.6134  | 0.9614  |
| k__Bacteria;p__Firmicutes;c__Bacilli;o__Bacillales;f__Bacillaceae;g__Bacillus;s__thermoamylovorans;                              | 0.0080    | 0.0000   | 0.0021 | 0.0092    | 0.0002   | 0.0083 | 0.9259  | 1.0000  |
| k__Bacteria;p__Proteobacteria;c__Gammaproteobacteria;o__Aeromonadales;f__Aeromonadaceae;g__Aeromonas;s__caviae;                  | 0.0082    | 0.0001   | 0.0070 | 0.0015    | 0.0000   | 0.0008 | 0.4644  | 0.9420  |
| k__Bacteria;p__Firmicutes;c__Bacilli;o__Bacillales;f__Bacillaceae;g__Bacillus;s__humi;                                           | 0.0096    | 0.0000   | 0.0033 | 0.0027    | 0.0000   | 0.0017 | 0.0966  | 0.7549  |
| k__Bacteria;p__Proteobacteria;c__Alphaproteobacteria;o__Rhizobiales;f__Rhizobiaceae;g__Amorphomonas;s__oryzae;                   | 0.0088    | 0.0000   | 0.0041 | 0.0019    | 0.0000   | 0.0017 | 0.1307  | 0.7549  |
| k__Bacteria;p__Fusobacteria;c__Fusobacteriia;o__Fusobacteriales;f__Fusobacteriaceae;g__Cetobacterium;s__somerae;                 | 0.0022    | 0.0000   | 0.0018 | 0.0004    | 0.0000   | 0.0003 | 0.4505  | 0.9420  |
| k__Bacteria;p__Actinobacteria;c__Actinobacteria;o__Actinomycetales;f__Pseudonocardiaceae;g__Thermocrispum;s__municipale;         | 0.0026    | 0.0000   | 0.0014 | 0.0020    | 0.0000   | 0.0018 | 0.8332  | 1.0000  |
| k__Bacteria;p__Proteobacteria;c__Gammaproteobacteria;o__Enterobacteriales;f__Enterobacteriaceae;g__Escherichia;s__coli;          | 0.0027    | 0.0000   | 0.0013 | 0.0003    | 0.0000   | 0.0002 | 0.0930  | 0.7549  |
| k__Bacteria;p__Firmicutes;c__Bacilli;o__Bacillales;f__Bacillaceae;g__Bacillus;s__firmus;                                         | 0.0032    | 0.0000   | 0.0009 | 0.0018    | 0.0000   | 0.0014 | 0.5362  | 0.9420  |
| k__Bacteria;p__Firmicutes;c__Clostridia;o__Clostridiales;f__Clostridiaceae;g__Clostridium;s__tyrobutyricum;                      | 0.0016    | 0.0000   | 0.0010 | 0.0005    | 0.0000   | 0.0003 | 0.2789  | 0.7696  |
| k__Bacteria;p__Actinobacteria;c__Actinobacteria;o__Actinomycetales;f__Pseudonocardiaceae;g__Saccharopolyspora;s__hirsuta;        | 0.0006    | 0.0000   | 0.0003 | 0.0011    | 0.0000   | 0.0011 | 0.7614  | 1.0000  |
| k__Bacteria;p__Proteobacteria;c__Alphaproteobacteria;o__Rhizobiales;f__Hyphomicrobiaceae;g__Rhodoplanes;s__elegans;              | 0.0019    | 0.0000   | 0.0009 | 0.0010    | 0.0000   | 0.0009 | 0.5793  | 0.9588  |
| k__Bacteria;p__Firmicutes;c__Clostridia;o__Clostridiales;f__Ruminococcaceae;g__Ruminococcus;s__flavefaciens;                     | 0.0009    | 0.0000   | 0.0009 | 0.0000    | 0.0000   | 0.0000 | 0.3290  | 0.7696  |
| k__Bacteria;p__Bacteroidetes;c__Bacteroidia;o__Bacteroidales;f__Bacteroidaceae;g__Bacteroides;s__acidifaciens;                   | 0.0014    | 0.0000   | 0.0007 | 0.0011    | 0.0000   | 0.0007 | 0.8939  | 1.0000  |
| k__Bacteria;p__Actinobacteria;c__Actinobacteria;o__Actinomycetales;f__Nocardiaceae;g__Rhodococcus;s__ruber;                      | 0.0015    | 0.0000   | 0.0007 | 0.0004    | 0.0000   | 0.0004 | 0.1872  | 0.7696  |
| k__Bacteria;p__Bacteroidetes;c__Bacteroidia;o__Bacteroidales;f__Porphyromonadaceae;g__Parabacteroides;s__distasonis;             | 0.0010    | 0.0000   | 0.0007 | 0.0005    | 0.0000   | 0.0003 | 0.7097  | 1.0000  |
| k__Bacteria;p__Firmicutes;c__Clostridia;o__Clostridiales;f__Lachnospiraceae;g__[Ruminococcus];s__gnavus;                         | 0.0008    | 0.0000   | 0.0006 | 0.0003    | 0.0000   | 0.0002 | 0.5111  | 0.9420  |
| k__Bacteria;p__Bacteroidetes;c__Bacteroidia;o__Bacteroidales;f__Bacteroidaceae;g__Bacteroides;s__caccae;                         | 0.0002    | 0.0000   | 0.0001 | 0.0006    | 0.0000   | 0.0006 | 0.5596  | 0.9573  |
| k__Bacteria;p__Proteobacteria;c__Alphaproteobacteria;o__Rhodospirillales;f__Rhodospirillaceae;g__Phaeospirillum;s__fulvum;       | 0.0007    | 0.0000   | 0.0005 | 0.0000    | 0.0000   | 0.0000 | 0.2267  | 0.7696  |
| k__Bacteria;p__Verrucomicrobia;c__Verrucomicrobiae;o__Verrucomicrobiales;f__Verrucomicrobiaceae;g__Akkermansia;s__muciniphila;   | 0.0008    | 0.0000   | 0.0004 | 0.0003    | 0.0000   | 0.0002 | 0.2897  | 0.7696  |
| k__Bacteria;p__Proteobacteria;c__Gammaproteobacteria;o__Alteromonadales;f__Shewanellaceae;g__Shewanella;s__algae;                | 0.0005    | 0.0000   | 0.0003 | 0.0004    | 0.0000   | 0.0003 | 0.8279  | 1.0000  |
| k__Bacteria;p__Firmicutes;c__Bacilli;o__Bacillales;f__Paenibacillaceae;g__Paenibacillus;s__lautus;                               | 0.0005    | 0.0000   | 0.0002 | 0.0002    | 0.0000   | 0.0001 | 0.0984  | 0.7549  |
| k__Bacteria;p__Deferribacteres;c__Deferribacteres;o__Deferribacterales;f__Deferribacteraceae;g__Mucispirillum;s__schaedleri;     | 0.0005    | 0.0000   | 0.0002 | 0.0002    | 0.0000   | 0.0001 | 0.4523  | 0.9420  |
| k__Bacteria;p__Proteobacteria;c__Alphaproteobacteria;o__Rhizobiales;f__Bradyrhizobiaceae;g__Afipia;s__felis;                     | 0.0005    | 0.0000   | 0.0002 | 0.0002    | 0.0000   | 0.0001 | 0.1982  | 0.7696  |
| k__Bacteria;p__Proteobacteria;c__Deltaproteobacteria;o__Desulfovibrionales;f__Desulfovibrionaceae;g__Desulfovibrio;s__C21_c20;   | 0.0003    | 0.0000   | 0.0002 | 0.0001    | 0.0000   | 0.0001 | 0.5040  | 0.9420  |
| k__Bacteria;p__Firmicutes;c__Bacilli;o__Lactobacillales;f__Lactobacillaceae;g__Lactobacillus;s__reuteri;                         | 0.0003    | 0.0000   | 0.0001 | 0.0002    | 0.0000   | 0.0001 | 0.6348  | 0.9614  |
| k__Bacteria;p__Bacteroidetes;c__Sphingobacteriia;o__Sphingobacteriales;f__Sphingobacteriaceae;g__Sphingobacterium;s__multivorum; | 0.0002    | 0.0000   | 0.0002 | 0.0000    | 0.0000   | 0.0000 | 0.3433  | 0.7696  |
| k__Archaea;p__Crenarchaeota;c__Thaumarchaeota;o__Nitrososphaerales;f__Nitrososphaeraceae;g__CandidatusNitrososphaera;s__SCA1145; | 0.0003    | 0.0000   | 0.0001 | 0.0001    | 0.0000   | 0.0001 | 0.2933  | 0.7696  |

|                                                                                                                                    |        |        |        |        |        |        |        |        |
|------------------------------------------------------------------------------------------------------------------------------------|--------|--------|--------|--------|--------|--------|--------|--------|
| k__Bacteria;p__Proteobacteria;c__Alphaproteobacteria;o__Rhizobiales;f__Hyphomicrobiaceae;g__Hyphomicrobium;s__zavarzinii;          | 0.0002 | 0.0000 | 0.0001 | 0.0001 | 0.0000 | 0.0001 | 0.8975 | 1.0000 |
| k__Bacteria;p__Proteobacteria;c__Gammaproteobacteria;o__Xanthomonadales;f__Xanthomonadaceae;g__Thermomonas;s__fusca;               | 0.0002 | 0.0000 | 0.0001 | 0.0000 | 0.0000 | 0.0000 | 0.2249 | 0.7696 |
| k__Bacteria;p__Firmicutes;c__Clostridia;o__Clostridiales;f__Clostridiaceae;g__Clostridium;s__thermopalmarium;                      | 0.0003 | 0.0000 | 0.0001 | 0.0001 | 0.0000 | 0.0001 | 0.0398 | 0.7549 |
| k__Bacteria;p__Firmicutes;c__Clostridia;o__Clostridiales;f__Clostridiaceae;g__Clostridium;s__butyricum;                            | 0.0002 | 0.0000 | 0.0001 | 0.0001 | 0.0000 | 0.0001 | 0.2519 | 0.7696 |
| k__Bacteria;p__Proteobacteria;c__Betaproteobacteria;o__Neisseriales;f__Neisseriaceae;g__Chitinilyticum;s__aquatile;                | 0.0001 | 0.0000 | 0.0001 | 0.0000 | 0.0000 | 0.0000 | 0.1765 | 0.7696 |
| k__Bacteria;p__Actinobacteria;c__Actinobacteria;o__Actinomycetales;f__Thermomonosporaceae;g__Actinomadura;s__vinacea;              | 0.0001 | 0.0000 | 0.0000 | 0.0001 | 0.0000 | 0.0001 | 0.9369 | 1.0000 |
| k__Bacteria;p__Firmicutes;c__Clostridia;o__Clostridiales;f__Clostridiaceae;g__Clostridium;s__tetani;                               | 0.0001 | 0.0000 | 0.0001 | 0.0001 | 0.0000 | 0.0000 | 0.5147 | 0.9420 |
| k__Bacteria;p__Firmicutes;c__Bacilli;o__Lactobacillales;f__Streptococcaceae;g__Streptococcus;s__luteciae;                          | 0.0001 | 0.0000 | 0.0001 | 0.0001 | 0.0000 | 0.0001 | 0.8707 | 1.0000 |
| k__Bacteria;p__Bacteroidetes;c__Sphingobacteriia;o__Sphingobacteriales;f__Sphingobacteriaceae;g__Sphingobacterium;s__mizutaii;     | 0.0001 | 0.0000 | 0.0001 | 0.0000 | 0.0000 | 0.0000 | 0.3433 | 0.7696 |
| k__Bacteria;p__Firmicutes;c__Bacilli;o__Bacillales;f__Thermoactinomycetaceae;g__Thermoactinomyces;s__sanguinis;                    | 0.0001 | 0.0000 | 0.0001 | 0.0001 | 0.0000 | 0.0000 | 0.5290 | 0.9420 |
| k__Bacteria;p__Proteobacteria;c__Gammaproteobacteria;o__Xanthomonadales;f__Xanthomonadaceae;g__Stenotrophomonas;s__acidaminiphila; | 0.0001 | 0.0000 | 0.0001 | 0.0000 | 0.0000 | 0.0000 | 0.0326 | 0.7549 |
| k__Bacteria;p__Firmicutes;c__Bacilli;o__Lactobacillales;f__Lactobacillaceae;g__Lactobacillus;s__mucosae;                           | 0.0000 | 0.0000 | 0.0000 | 0.0001 | 0.0000 | 0.0001 | 0.3433 | 0.7696 |
| k__Bacteria;p__Firmicutes;c__Clostridia;o__Clostridiales;f__Peptococcaceae;g__Desulfosporosinus;s__meridiei;                       | 0.0000 | 0.0000 | 0.0000 | 0.0001 | 0.0000 | 0.0000 | 0.5900 | 0.9588 |
| k__Bacteria;p__Firmicutes;c__Bacilli;o__Lactobacillales;f__Lactobacillaceae;g__Lactobacillus;s__parlamentarius;                    | 0.0001 | 0.0000 | 0.0000 | 0.0000 | 0.0000 | 0.0000 | 0.2035 | 0.7696 |
| k__Bacteria;p__Lentisphaeria;c__[Lentisphaeria];o__Victivallales;f__Victivallaceae;g__Victivallis;s__vadensis;                     | 0.0000 | 0.0000 | 0.0000 | 0.0000 | 0.0000 | 0.0000 | 0.1394 | 0.7549 |
| k__Bacteria;p__Proteobacteria;c__Gammaproteobacteria;o__Pseudomonadales;f__Pseudomonadaceae;g__Pseudomonas;s__thermotolerans;      | 0.0000 | 0.0000 | 0.0000 | 0.0000 | 0.0000 | 0.0000 | 0.3433 | 0.7696 |
| k__Bacteria;p__Bacteroidetes;c__Bacteroidia;o__Bacteroidales;f__Prevotellaceae;g__Prevotella;s__copri;                             | 0.0000 | 0.0000 | 0.0000 | 0.0000 | 0.0000 | 0.0000 | 0.3433 | 0.7696 |
| k__Bacteria;p__Firmicutes;c__Clostridia;o__Clostridiales;f__Clostridiaceae;g__Clostridium;s__bowmanii;                             | 0.0000 | 0.0000 | 0.0000 | 0.0000 | 0.0000 | 0.0000 | 0.9696 | 1.0000 |
| k__Bacteria;p__Proteobacteria;c__Deltaproteobacteria;o__Bdellovibrionales;f__Bdellovibrionaceae;g__Bdellovibrio;s__bacteriovorus;  | 0.0000 | 0.0000 | 0.0000 | 0.0000 | 0.0000 | 0.0000 | 0.3433 | 0.7696 |
| k__Bacteria;p__Proteobacteria;c__Alphaproteobacteria;o__Rhodospirillales;f__Rhodospirillaceae;g__Constrictibacter;s__antarcticus;  | 0.0001 | 0.0000 | 0.0000 | 0.0000 | 0.0000 | 0.0000 | 0.0700 | 0.7549 |
| k__Bacteria;p__Proteobacteria;c__Alphaproteobacteria;o__Rhodospirillales;f__Rhodospirillaceae;g__Elstera;s__litoralis;             | 0.0000 | 0.0000 | 0.0000 | 0.0000 | 0.0000 | 0.0000 | 0.6508 | 0.9614 |
| k__Bacteria;p__Proteobacteria;c__Alphaproteobacteria;o__Rhodobacterales;f__Rhodobacteraceae;g__Paracoccus;s__aminovorans;          | 0.0000 | 0.0000 | 0.0000 | 0.0000 | 0.0000 | 0.0000 | 0.1394 | 0.7549 |
| k__Bacteria;p__Proteobacteria;c__Betaproteobacteria;o__Methylophilales;f__Methylophilaceae;g__Methylophilum;s__mobilis;            | 0.0001 | 0.0000 | 0.0000 | 0.0000 | 0.0000 | 0.0000 | 0.0700 | 0.7549 |
| k__Bacteria;p__Firmicutes;c__Clostridia;o__Clostridiales;f__Ruminococcaceae;g__Butyricoccus;s__pullicaeorum;                       | 0.0000 | 0.0000 | 0.0000 | 0.0000 | 0.0000 | 0.0000 | 0.6508 | 0.9614 |
| k__Bacteria;p__Bacteroidetes;c__[Saprosirae];o__[Saprosirales];f__Chitinophagaceae;g__Parasegitibacter;s__luojieensis;             | 0.0000 | 0.0000 | 0.0000 | 0.0000 | 0.0000 | 0.0000 | 0.1072 | 0.7549 |
| k__Bacteria;p__Proteobacteria;c__Alphaproteobacteria;o__Rhizobiales;f__Rhizobiaceae;g__Prosthecomicrobium;s__pneumaticum;          | 0.0000 | 0.0000 | 0.0000 | 0.0000 | 0.0000 | 0.0000 | 0.1072 | 0.7549 |
| k__Bacteria;p__Actinobacteria;c__Actinobacteria;o__Actinomycetales;f__Microbacteriaceae;g__Pseudoclavibacter;s__bifida;            | 0.0000 | 0.0000 | 0.0000 | 0.0000 | 0.0000 | 0.0000 | 1.0000 | 1.0000 |
| k__Bacteria;p__Proteobacteria;c__Alphaproteobacteria;o__Rhodospirillales;f__Rhodospirillaceae;g__Inquilinus;s__limosus;            | 0.0000 | 0.0000 | 0.0000 | 0.0000 | 0.0000 | 0.0000 | 1.0000 | 1.0000 |
| k__Bacteria;p__Firmicutes;c__Clostridia;o__Clostridiales;f__Lachnospiraceae;g__Clostridium;s__colinum;                             | 0.0000 | 0.0000 | 0.0000 | 0.0000 | 0.0000 | 0.0000 | 1.0000 | 1.0000 |
| k__Bacteria;p__Proteobacteria;c__Gammaproteobacteria;o__Vibrionales;f__Vibrionaceae;g__Aliivibrio;s__fischeri;                     | 0.0000 | 0.0000 | 0.0000 | 0.0000 | 0.0000 | 0.0000 | 1.0000 | 1.0000 |

|                                                                                                                                   |        |        |        |        |        |        |        |        |
|-----------------------------------------------------------------------------------------------------------------------------------|--------|--------|--------|--------|--------|--------|--------|--------|
| k__Bacteria;p__Bacteroidetes;c__Flavobacteriia;o__Flavobacteriales;f__Flavobacteriaceae;g__Flavobacterium;s__sucinicans;          | 0.0000 | 0.0000 | 0.0000 | 0.0000 | 0.0000 | 0.0000 | 1.0000 | 1.0000 |
| k__Bacteria;p__Firmicutes;c__Clostridia;o__Clostridiales;f__Clostridiaceae;g__Clostridium;s__intestinale;                         | 0.0000 | 0.0000 | 0.0000 | 0.0000 | 0.0000 | 0.0000 | 1.0000 | 1.0000 |
| k__Bacteria;p__Bacteroidetes;c__Sphingobacteriia;o__Sphingobacteriales;f__Sphingobacteriaceae;g__Solitalea;s__canadensis;         | 0.0000 | 0.0000 | 0.0000 | 0.0000 | 0.0000 | 0.0000 | 1.0000 | 1.0000 |
| k__Archaea;p__Euryarchaeota;c__Methanobacteria;o__Methanobacteriales;f__Methanobacteriaceae;g__Methanobacterium;s__bryantii;      | 0.0000 | 0.0000 | 0.0000 | 0.0000 | 0.0000 | 0.0000 | 1.0000 | 1.0000 |
| k__Bacteria;p__Firmicutes;c__Clostridia;o__Clostridiales;f__Veillonellaceae;g__Veillonella;s__dispar;                             | 0.0000 | 0.0000 | 0.0000 | 0.0000 | 0.0000 | 0.0000 | 1.0000 | 1.0000 |
| k__Archaea;p__Crenarchaeota;c__Thaumarchaeota;o__Nitrososphaerales;f__Nitrososphaeraceae;g__Candidatus Nitrososphaera;s__SCA1170; | 0.0000 | 0.0000 | 0.0000 | 0.0000 | 0.0000 | 0.0000 | 1.0000 | 1.0000 |
| Others                                                                                                                            | 0.8149 | 0.0073 | 0.0492 | 0.7569 | 0.0582 | 0.1393 | 0.8010 | 1.0000 |
